# 1      **Urbilaterian origin and evolution of sNPF-type neuropeptide signalling**

2  
3      Luis Alfonso Yañez-Guerra<sup>1\*</sup>, Xingxing Zhong<sup>1\*</sup>, Ismail Moghul<sup>1,4</sup>, Thomas Butts<sup>1,5</sup>,  
4      Cleidiane G. Zampronio<sup>2</sup>, Alexandra M. Jones<sup>2</sup>, Olivier Mirabeau<sup>3</sup>, Maurice R. Elphick<sup>1+</sup>.

5  
6      **1.** Queen Mary University of London, School of Biological & Chemical Sciences,  
7      Mile End Road, London, E1 4NS, UK

8      **2.** School of Life Sciences and Proteomics Research Technology Platform, University of  
9      Warwick, Coventry, CV4 7AL, UK

10      **3.** Cancer Genetics Unit, Institut Curie, Paris, France

## 11      **E-mail addresses:**

12      Luis Alfonso Yañez Guerra: [l.a.yanezguerra@qmul.ac.uk](mailto:l.a.yanezguerra@qmul.ac.uk)

13      Xingxing Zhong: [x.zhong@qmul.ac.uk](mailto:x.zhong@qmul.ac.uk)

14      Ismail Moghul: [ismail.moghul@gmail.com](mailto:ismail.moghul@gmail.com)

15      Thomas Butts: [thomas.butts@liverpool.ac.uk](mailto:thomas.butts@liverpool.ac.uk)

16      Cleidiane Zampronio: [c.g.zampronio@warwick.ac.uk](mailto:c.g.zampronio@warwick.ac.uk)

17      Alexandra M. Jones: [alex.jones@warwick.ac.uk](mailto:alex.jones@warwick.ac.uk)

18      Olivier Mirabeau: [olivier.mirabeau@gmail.com](mailto:olivier.mirabeau@gmail.com)

19      Maurice R. Elphick: [m.r.elphick@qmul.ac.uk](mailto:m.r.elphick@qmul.ac.uk)

20  
21  
22      \* These authors contributed equally

23      + Corresponding author: Queen Mary University of London, School of Biological &  
24      Chemical Sciences, Mile End Road, London, E1 4NS, UK. [m.r.elphick@qmul.ac.uk](mailto:m.r.elphick@qmul.ac.uk)

25  
26      Present address:

27      4. UCL Cancer Institute, University College London, London, WC1E 6DD, UK

28      5. School of Life Sciences, Crown Street, Liverpool, L69 7ZB, UK  
29

30 **Abstract**

31

32 Physiology and behaviour are controlled by neuropeptide signalling systems comprising  
33 peptide ligands and cognate receptors. Molecular phylogenetics combined with experimental  
34 identification of neuropeptide-receptor pairs has revealed that many neuropeptide signalling  
35 systems originated in the urbilaterian common ancestor of protostomes and deuterostomes.  
36 Neuropeptide-Y/neuropeptide-F (NPY/NPF)-type signalling is one such example, whereas  
37 NPY/NPF-related short-NPF (sNPF)-type signalling has hitherto only been identified in  
38 protostomes. Here we report the discovery of a neuropeptide  
39 (pQDRSKAMQAERTGQLRRLNPRF-NH<sub>2</sub>) that is the ligand for an sNPF-type receptor in  
40 a deuterostome, the starfish *Asterias rubens* (Phylum Echinodermata). Informed by  
41 phylogenetic analysis of sequence data, we conclude that the paralogous NPY/NPF-type and  
42 sNPF-type signalling systems originated in Urbilateria but NPY/NPF-type signalling was lost  
43 in echinoderms. Furthermore, we present evidence that sNPF-type peptides are orthologs of  
44 vertebrate prolactin-releasing peptides. Our findings demonstrate the importance of  
45 experimental studies on echinoderms for reconstructing the evolutionary history of  
46 neuropeptide signalling systems.

## 47 **Introduction**

48       Neuropeptides are neuronally secreted signalling molecules that regulate many  
49 physiological processes and behaviours in animals, including feeding, digestion, reproduction  
50 and social behaviour. They typically exert effects by binding to cognate G-protein coupled  
51 receptors (GPCRs) on target cells, which leads to changes in the activity of downstream  
52 effectors (e.g. ion channels, enzymes) (Jékely et al. 2018). Investigation of the evolution of  
53 neuropeptide signalling has revealed that many of the neuropeptide systems found in  
54 vertebrates have orthologs in invertebrate deuterostomes (urochordates, cephalochordates,  
55 hemichordates, echinoderms) and protostomes (e.g. arthropods, nematodes, molluscs,  
56 annelids, platyhelminthes). Thus, the evolutionary origin of over thirty neuropeptide  
57 signalling systems has been traced back to the common ancestor of the Bilateria (Urbilateria)  
58 (Mirabeau and Joly 2013; Elphick et al. 2018; Jékely et al. 2018).

59       One of the neuropeptide signalling systems that originated in Urbilateria is  
60 neuropeptide Y (NPY)-type signalling. NPY is a 36-residue peptide that was first isolated  
61 from the porcine hypothalamus (Tatemoto et al. 1982; Tatemoto 1982) but that is also  
62 expressed by neurons in many other regions of the nervous system (Adrian et al. 1983;  
63 Morris 1989) and in peripheral organs such as the gut and cardiovascular system (Holzer et  
64 al. 2012; Farzi et al. 2015). Accordingly, NPY is pleiotropic (Pedrazzini et al. 2003), but it is  
65 perhaps most widely known as a potent stimulant of food intake in mammals (Minor et al.  
66 2009; Zhang et al. 2011).

67       NPY belongs to a family of related signalling molecules in vertebrates, including  
68 peptide YY (PYY) and pancreatic polypeptide (PP), that evolved from a common ancestral  
69 peptide by gene/genome duplication (Larhammar et al. 1993; Larhammar 1996; Elphick et al.  
70 2018). Furthermore, the sequences of NPY-type peptides are highly conserved across the  
71 vertebrates, sharing up to 92% identity between mammals and cartilaginous fish (Larhammar  
72 et al. 1993; Larhammar 1996; Cerdá-Reverter et al. 2000). A neuropeptide in vertebrates that  
73 is evolutionarily related to NPY/PYY/PP-type peptides is prolactin-releasing peptide (PrRP),  
74 which was first discovered as a ligand for the orphan receptor hGR3 (Hinuma et al. 1998).  
75 Phylogenetic analysis has revealed that PrRP-type receptors are paralogs of NPY/PYY/PP-  
76 type receptors and it has been proposed that PrRP-type signalling originated in the vertebrate  
77 lineage (Lagerström et al. 2005). However, more recently, orthologs of vertebrate PrRP-type  
78 receptors have been identified in invertebrate deuterostomes - the cephalochordate  
79 *Branchiostoma floridae* and the hemichordate *Saccoglossus kowalevskii* - indicating that  
80 PrRP-type signalling may have originated in a common ancestor of the deuterostomes  
81 (Mirabeau and Joly 2013).

82       An important insight into the evolutionary history of NPY-type peptides was obtained  
83 by purification from extracts of a protostome invertebrate, the platyhelminth *Moniezia*  
84 *expansa*, of a peptide immunoreactive with antibodies to the C-terminal hexapeptide of PP  
85 (Maule et al. 1991). Sequencing revealed a 39-residue peptide with a similar structure to  
86 NPY, but with the C-terminal tyrosine (Y) substituted with a phenylalanine (F). Hence, this  
87 invertebrate NPY homolog was named neuropeptide F (NPF) (Maule et al. 1991).  
88 Subsequently, NPF-type neuropeptides have been identified in other protostomian  
89 invertebrates, including other platyhelminths (Curry et al. 1992), molluscs (Leung et al. 1992;

90 Rajpara et al. 1992), annelids (Díaz-Miranda et al. 1991; Veenstra 2011; Conzelmann et al.  
91 2013; Bauknecht and Jékely 2015) and arthropods (Brown et al. 1999), and these peptides  
92 typically have a conserved C-terminal RPRFamide motif and range in length from 36 to 43  
93 residues.

94 Following the discovery of *M. expansa* NPF, antibodies to this peptide were  
95 generated and used to assay for related peptides in other invertebrates. Interestingly, this  
96 resulted in the discovery of two novel peptides, ARGPQLRLRFamide and  
97 APSLRLRFamide, in brain extracts from the Colorado potato beetle *Leptinotarsa*  
98 *decemlineata* (Spittaels et al. 1996). As these peptides were isolated using antibodies to *M.*  
99 *expansa* NPF, they were originally referred to as NPF-related peptides. However, because  
100 they are much shorter in length than NPF, they were later renamed as short neuropeptide F  
101 (sNPF) (Vanden Broeck 2001) and homologs were identified in other insects (Schoofs et al.  
102 2001). Furthermore, alignment of NPY-type peptides and precursors from vertebrates with  
103 NPF-type and sNPF-type peptides and precursors from protostomes revealed that whilst NPF  
104 peptides are clearly closely related (orthologous) to vertebrate NPY peptides, sNPF peptides  
105 and precursors exhibit too many differences to be considered orthologs of NPY/NPF-type  
106 peptides and precursors (Nässel and Wegener 2011). Further evidence that chordate NPY-  
107 type and invertebrate NPF-type neuropeptides are orthologous has been provided by  
108 similarity-based clustering methods, showing that the NPY-type and NPF-type precursors  
109 form a pan-bilaterian cluster, whereas sNPF-type precursors form a separate cluster (Jékely  
110 2013). Thus, sNPF-type peptides are considered to be a family of neuropeptides that is  
111 distinct from the NPY/NPF-type family of neuropeptides.

112 A receptor for sNPF-type peptides was first identified in the fruit fly *Drosophila*  
113 *melanogaster* with the deorphanisation of the G-protein coupled receptor CG7395 (Mertens  
114 et al. 2002), which was previously annotated as a homolog of mammalian NPY-type  
115 receptors. Subsequently, sNPF receptors have been identified in other insects, including the  
116 fire ant *Solenopsis Invicta* (Chen and Pietrantonio 2006), the mosquitoes *Anopheles gambiae*  
117 (Garczynski et al. 2007) and *Aedes aegypti* (Christ et al. 2018), the desert locust *Schistocerca*  
118 *gregaria* (Dillen, Zels, et al. 2013), the oriental fruit fly *Bactrocera dorsalis* (Jiang et al.  
119 2017) and in the silkworm *Bombyx mori* (Yamanaka et al. 2008; Ma et al. 2017).

120 A variety of physiological roles have been attributed to sNPF-type peptides in insects,  
121 with the most consistent being actions related to the regulation of feeding behaviour. For  
122 example, in *D. melanogaster* overexpression of sNPF increases food intake both in larvae and  
123 adults, whilst loss-of-function sNPF-mutants show reduced food intake (Lee et al. 2004). In  
124 *A. mellifera*, food-deprivation upregulates transcription of the sNPF receptor gene and  
125 quantitative peptidomics reveals a correlation between sNPF peptide levels and the pollen  
126 foraging predisposition of worker bees (Brockmann et al. 2009; Ament et al. 2011). In  
127 contrast, in the locust *S. gregaria* sNPF inhibits food intake, whilst knockdown of sNPF  
128 precursor or sNPF receptor gene expression significantly increases food intake, indicating  
129 that sNPF acts as a satiety signal in locusts (Dillen, Verdonck, et al. 2013; Dillen, Zels, et al.  
130 2013). In the cockroach *Periplaneta americana*, starvation followed by feeding increases and  
131 then decreases, respectively, the number of sNPF-immunoreactive cells in the midgut  
132 epithelium.

133 Since sNPF signalling was discovered in insects, it was initially thought that this

134 neuropeptide system may be unique to arthropods (Nässel and Wegener 2011). However, a  
135 large-scale phylogenetic analysis of G-protein coupled neuropeptide receptors revealed that  
136 sNPF-type signalling may also be present in other protostomes (Mirabeau and Joly 2013).  
137 Thus, an expanded family of neuropeptide receptors in the nematode *C. elegans* that had  
138 originally been annotated as NPY/NPF-type receptors (Cardoso et al. 2012) were found to be  
139 orthologs of insect sNPF-receptors (Mirabeau and Joly 2013). Furthermore, whilst  
140 NPY/NPF-type peptides and their receptors were identified as a bilaterian neuropeptide  
141 signalling system, it was proposed that sNPF-type signalling may be restricted to protostomes  
142 (Mirabeau and Joly 2013). Subsequently, sNPF-type peptides and a cognate receptor have  
143 been characterised in the bivalve mollusc *Crassostrea gigas*, confirming the occurrence of  
144 this signalling system in the lophotrochozoan branch of the protostomes (Bigot et al. 2014).  
145 Furthermore, functional studies revealed that starvation causes upregulated expression of the  
146 sNPF precursor and receptor in the visceral ganglia of *C. gigas*, providing evidence of an  
147 evolutionarily conserved role of sNPF-type peptides in feeding-related processes in  
148 protostomes (Bigot et al. 2014). Orthologs of the *C. gigas* sNPF-type peptides have been  
149 identified in other molluscs, and interestingly other functions of this family of neuropeptides  
150 have been reported. For example, in the gastropod *Lymnaea stagnalis* sNPF-type peptides are  
151 upregulated in response to infection with the parasite *Trichobilharzia ocellata*, causing an  
152 accelerated increase in body weight, reduced metabolism and retarded development of the  
153 reproductive system (Hoek et al. 2005). Furthermore, in the cephalopod *Sepia officinalis* the  
154 sNPF-type peptide GNLFRRamide acts as a myoactive peptide on the rectum, increasing the  
155 frequency, tonus and amplitude of the rectal contractions (Zatylny-Gaudin et al. 2010).

156 Important insights into neuropeptide evolution have been obtained recently by  
157 pharmacological characterisation of G-protein coupled neuropeptide receptors in invertebrate  
158 deuterostomes (Kawada et al. 2010; Jékely 2013; Mirabeau and Joly 2013; Elphick and  
159 Mirabeau 2014; Roch et al. 2014; Satoh et al. 2014; Semmens et al. 2016; Tian et al. 2016;  
160 Yañez-Guerra et al. 2018). However, currently little is known about the occurrence and  
161 characteristics of NPY/NPF/sNPF-related signalling systems in invertebrate deuterostomes.  
162 Phylogenetic analysis of bilaterian G-protein coupled neuropeptide receptors has  
163 demonstrated the occurrence of NPY/NPF receptor-related proteins in ambulacrarians – the  
164 echinoderm *Strongylocentrotus purpuratus* and the hemichordate *Saccoglossus kowalevskii*  
165 (Mirabeau and Joly 2013). Furthermore, the precursor of a putative NPY/NPF-type peptide  
166 was identified in *S. kowalevskii* (Mirabeau and Joly 2013; Elphick and Mirabeau 2014). A  
167 candidate NPY/NPF-type precursor has also been identified in the cephalochordate  
168 *Branchiostoma floridae*, but an NPY/NPF-type receptor has yet to be identified in this  
169 species (Mirabeau and Joly 2013; Elphick and Mirabeau 2014). A more recent finding was  
170 the discovery of a family neuropeptide precursor-type proteins in echinoderms that contain a  
171 peptide that shares sequence similarity with NPY/NPF-type peptides (Zandawala et al. 2017).  
172 However, it is not known if these proteins are orthologs of vertebrate NPY-type precursor  
173 peptides and protostome NPF-type precursor peptides. To address this issue, detailed analysis  
174 of the sequences of the echinoderm NPY/NPF-like peptides and precursors and the genes  
175 encoding these peptides/proteins is needed. Furthermore, the receptors for echinoderm  
176 NPY/NPF-like peptides need to be identified. Accordingly, here we report the biochemical  
177 and pharmacological characterisation of a NPY/NPF/sNPF-related signalling system in an

178 echinoderm – the starfish *Asterias rubens*. Furthermore, informed by detailed phylogenetic  
179 analyses, we provide new insights into the evolutionary history of NPY/NPF-type and sNPF-  
180 type signalling in the Bilateria.

## 181 **Results**

### 182 **NPY-like peptides in the starfish *Asterias rubens* and in other echinoderms**

183 The sequence of a transcript (contig 1060225; accession number MK033631.1)  
184 encoding the precursor of an NPY-like neuropeptide has been reported previously based on  
185 analysis of *A. rubens* neural transcriptome sequence data (Zandawala et al. 2017). Here, a  
186 cDNA encoding this precursor was cloned and sequenced, revealing that the open reading  
187 frame encodes a 108-residue protein comprising a predicted 19-residue signal peptide, a 23-  
188 residue NPY-like peptide sequence with an N-terminal glutamine residue and a C-terminal  
189 glycine residue, followed by a putative monobasic cleavage site (Supplementary Figure 1A).  
190 Analysis of radial nerve cord extracts using mass spectrometry (LC-MS-MS) revealed the  
191 presence of a peptide with the structure pQDRSKAMQAERTGQLRRLNPRF-NH<sub>2</sub>,  
192 showing that the N-terminal glutamine and C-terminal glycine in the precursor peptide are  
193 post-translationally converted to a pyroglutamate residue and amide, respectively  
194 (Supplementary Figure 1B). Having determined the structure of this peptide, we provisionally  
195 named it *A. rubens* NPY-like peptide or ArNPYLP.

196 The ArNPYLP sequence was aligned with related peptides from other echinoderms  
197 and with NPY/NPF-type peptides from other phyla (Figure 1). This revealed that ArNPYLP  
198 and a closely related peptide in the starfish *Acanthaster planci* both share a C-terminal  
199 PRFamide sequence with several protostome NPF-type peptides. In contrast, related peptides  
200 in two other echinoderms, a brittle star and a sea urchin, have a C-terminal RYamide motif,  
201 which is a characteristic of vertebrate NPY-type peptides. However, the alignment also  
202 revealed that the echinoderm NPY-like peptides are shorter (22-25 residues) than NPY/NPF-  
203 type peptides in other taxa (30-41 residues). Furthermore, the echinoderm peptides lack two  
204 proline (P) residues that are a conserved feature of the N-terminal region of many NPY/NPF-  
205 type peptides, with the exception some peptides that have only one of these proline residues  
206 and a peptide in the cephalochordate *Branchiostoma floridae* that has neither (Figure 1).  
207 Furthermore, there are four other residues that are highly conserved in bilaterian NPY/NPF  
208 peptides - tyrosine (Y), leucine (L), tyrosine (Y) and isoleucine (I) residues, which are  
209 marked with asterisks in Figure 1. Importantly, none of these residues are present in the  
210 echinoderm NPY-like peptides. It is noteworthy, however, that all but one of the  
211 aforementioned six conserved residues in NPY/NPF-type peptides are present in a peptide  
212 from a species belonging to a sister phylum of the echinoderms – the hemichordate  
213 *Saccoglossus kowalevskii* (Figure 1) (Mirabeau and Joly 2013; Elphick and Mirabeau 2014).  
214 Collectively these findings indicated that ArNPYLP and related peptides in other  
215 echinoderms may not be orthologs of NPY/NPF-type peptides.



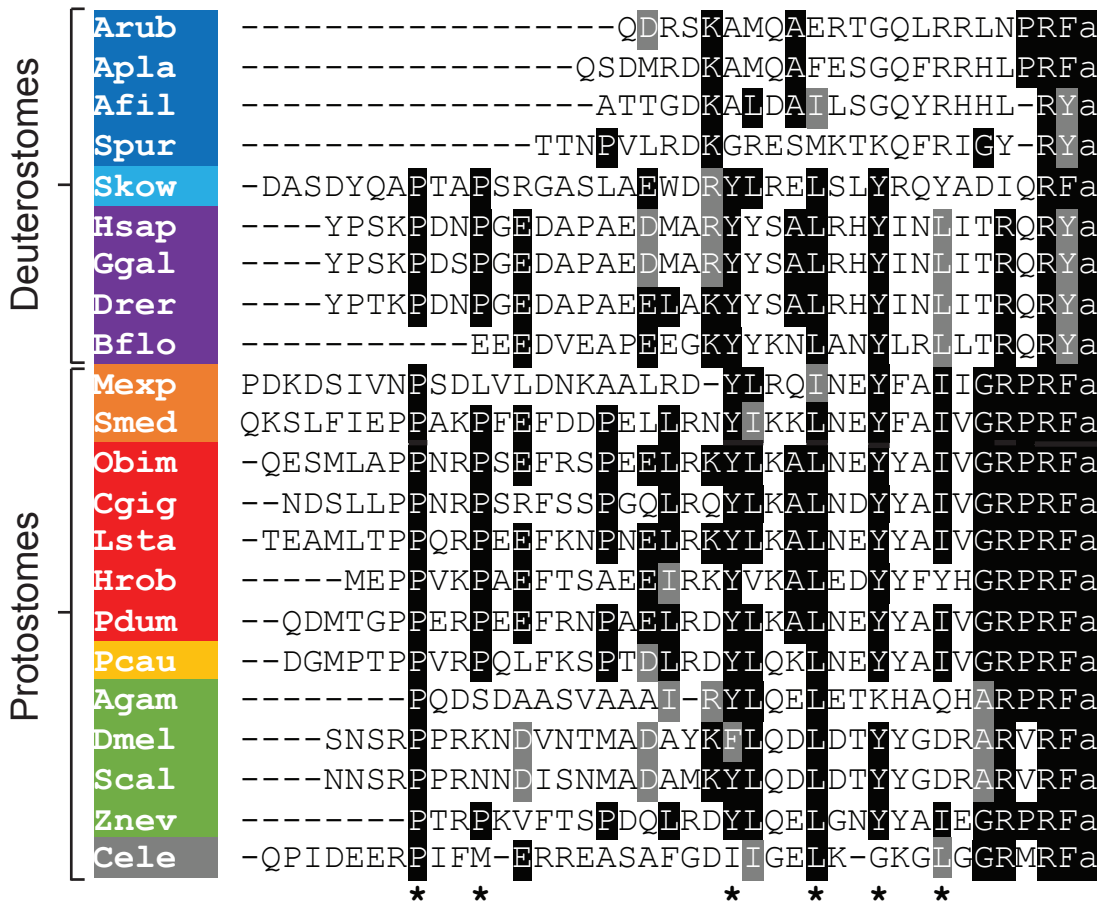

216  
217  
218  
219  
220  
221  
222  
223  
224  
225  
226  
227  
228  
229  
230  
231

**Figure 1. Comparison of the sequences of echinoderm NPY-like peptides with NPY/NPF-type peptides from other taxa.** Conserved residues are highlighted in black or grey. The asterisks indicate residues that have been shown to be important for the three-dimensional structure of the NPY/NPF-type peptides, but which are not present in the echinoderm NPY-like peptides. Species names are highlighted in phylum-specific or superphylum-specific colours: dark blue (Echinodermata), light blue (Hemichordata), purple (Chordata), orange (Platyhelminthes), red (Lophotrochozoa), yellow (Priapulida), green (Arthropoda), grey (Nematoda). Species names are as follows: Arub (*Asterias rubens*), Apla (*Acanthaster planci*), Afil (*Amphiura filiformis*), Spur (*Strongylocentrotus purpuratus*), Skow (*Saccoglossus kowalevskii*), Hsap (*Homo sapiens*), Ggal (*Gallus gallus*), Drer (*Danio rerio*), Bflo (*Branchiostoma floridae*), Mexp (*Moniezia expansa*), Smed (*Schmidtea mediterranea*), Obim (*Octopus bimaculoides*), Cgig (*Crassostrea gigas*), Lsta (*Lymnaea stagnalis*), Hrob (*Helobdella robusta*), Pdum (*Platynereis dumerilii*), Pcau (*Priapulus caudatus*), Agam (*Anopheles gambiae*), Dmel (*Drosophila melanogaster*), Scal (*Stomoxys calcitrans*), Znev (*Zootermopsis nevadensis*), Cele (*Caenorhabditis elegans*). The accession numbers of the sequences included in this alignment are listed in supplementary table 1.

### 232 **The exon-intron structure of echinoderm NPYLP genes is different to NPY/NPF genes**

233 To investigate further our proposition that echinoderm NPY-like neuropeptides may  
234 not be orthologs of NPY/NPF-type neuropeptides, we compared the exon-intron structure of  
235 genes encoding these peptides. Previous studies have reported that a conserved feature of  
236 NPY/NPF genes is an intron that interrupts the coding sequence for NPY/NPF-type peptides,  
237 with the intron located between the second and third nucleotide of the codon for the arginine  
238 residue of the C-terminal RF or RY dipeptide (Mair et al. 2000). Here we show this  
239 conserved feature in NPY/NPF genes in species from several animal phyla, including a  
240 hemichordate (sister phylum to the echinoderms), chordates, molluscs, an annelid, a



241 priapulid, an arthropod and a nematode (Figure 2). Because genome sequence data are  
 242 currently not available for the starfish *A. rubens*, we examined the structure of the NPYLP  
 243 gene in echinoderm species where genome sequences have been obtained – the starfish *A.*  
 244 *planci* and the sea urchin *S. purpuratus*. This revealed that in the echinoderm NPYLP genes  
 245 the coding sequence for NPYLP is interrupted by an intron, but it is located in a different  
 246 position to the intron that interrupts the coding sequence for NPY/NPF-type peptides. Thus, it  
 247 does not interrupt the codon for the arginine of the C-terminal RF or RY motif, but instead it  
 248 is located between the first and second nucleotide of the codon for an alanine (*A. planci*) or  
 249 glycine (*S. purpuratus*) residue located in the N-terminal or central regions, respectively, of  
 250 the NPYLPs (Figure 2). Another difference is that typically in NPY/NPF genes there is  
 251 another intron that interrupts the coding sequence in the C-terminal region of the precursor  
 252 protein, whereas in the echinoderm NPYLP genes the coding sequence for the C-terminal  
 253 region of the precursor protein is not interrupted by an intron. Collectively, these findings  
 254 provide further evidence that the echinoderm NPY-like peptides are not orthologs of  
 255 NPY/NPF-type neuropeptides.  
 256

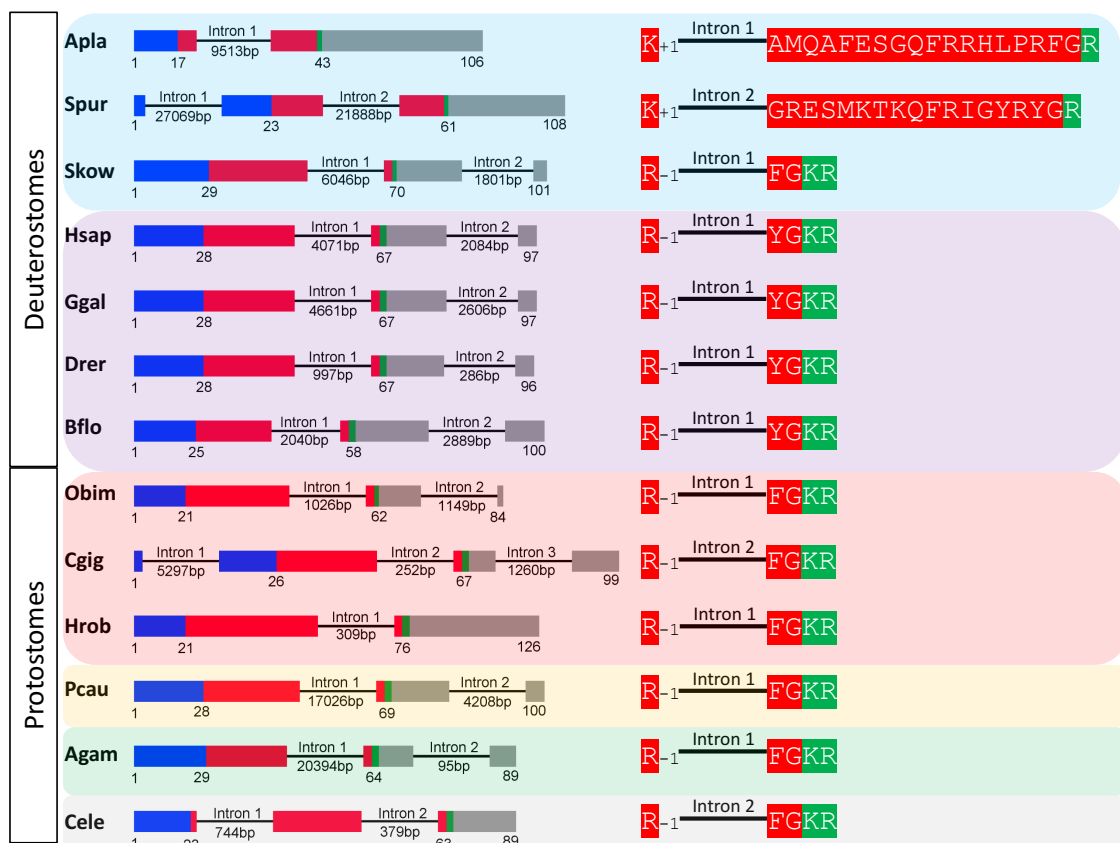

257  
 258 **Figure 2. Comparison of the exon/intron structure of genes encoding echinoderm precursors of**  
 259 **NPY-like peptides and genes encoding NPY/NPF-type precursors in other taxa.** The left side of the  
 260 figure shows schematic representations of the gene structures, with protein-coding exons shown as  
 261 rectangles and introns shown as lines (with intron length stated underneath). The protein-coding exons are  
 262 colour-coded to show regions that encode the N-terminal signal peptide (blue), the neuropeptide (red),  
 263 monobasic or dibasic cleavage sites (green) and other regions of the precursor protein (grey). The right  
 264 side of the figure shows how an intron interrupts the coding sequence of the neuropeptides, but the position  
 265 of the intron is different for echinoderm NPY-like peptides and bilaterian NPY/NPF-type neuropeptides. In  
 266 genes encoding echinoderm NPY-like peptides the intron interrupts the coding sequence in the N-terminal

267 or central region of the NPY-like peptide, with the intron located between the first and second nucleotides  
268 of the codon for an alanine (*A. planci*) or glycine (*S. purpuratus*) residue and the position of the intron in  
269 the reading frame is therefore represented as +1. In contrast, in bilaterian NPY/NPF genes the intron  
270 interrupts the coding sequence for NPY/NPF-type peptides between the second and third nucleotide of the  
271 codon for the arginine residue of the C-terminal RF or RY dipeptide and the position of the intron in the  
272 reading frame is therefore represented as -1. Species names are as follows: Apla (*Acanthaster planci*), Spur  
273 (*Strongylocentrotus purpuratus*), Skow (*Saccoglossus kowalevskii*), Hsap (*Homo sapiens*), Ggal (*Gallus*  
274 *gallus*), Drer (*Danio rerio*), Bflo (*Branchiostoma floridae*), Obim (*Octopus bimaculoides*), Cgig  
275 (*Crassostrea gigas*), Hrob (*Helobdella robusta*), Pcau (*Priapulid caudatus*), Agam (*Anopheles gambiae*),  
276 Cele (*Caenorhabditis elegans*). The accession numbers for the sequences of the precursors shown in this  
277 figure are listed in supplementary table 2.  
278

279 **Discovery of orthologs of sNPF-type receptors in *A. rubens* and other echinoderms**

280 Having obtained evidence that the echinoderm NPY-like peptides are not orthologs  
281 of NPY/NPF-type neuropeptides in other bilaterians, we then investigated the occurrence  
282 in *A. rubens* and other echinoderms of proteins related to G-protein coupled receptors that  
283 mediate effects of NPY/NPF-type peptides and sNPF-type peptides in other bilaterians.  
284 Using receptor sequences for the *H. sapiens* NPY-type, *D. melanogaster* NPF-type and *D.*  
285 *melanogaster* sNPF-type receptors as queries for similarity-based analysis of *A. rubens*  
286 neural transcriptome sequence data, a transcript (contig 1120879) encoding a 386-residue  
287 protein was identified as the best hit (Supplementary Figure 2). Homologs of this protein  
288 were also identified in other echinoderms, including the starfish *A. planci*, the sea urchin  
289 *S. purpuratus* and the sea cucumber *A. japonicus*. To determine the relationship of these  
290 echinoderm receptors with other bilaterian neuropeptide receptors, we performed a  
291 phylogenetic analysis using the maximum likelihood method. For this analysis, in addition  
292 to bilaterian NPY/NPF-type receptors and protostome sNPF-type receptors, we also  
293 included receptors that are closely related to NPY/NPF-type and sNPF-type receptors -  
294 prolactin-releasing peptide-type, GPR83-type, tachykinin (TK)-type and luqin (LQ)-type  
295 receptors. This revealed that the echinoderm receptors are positioned within a branch of the  
296 phylogenetic tree that comprises NPY/NPF-type and sNPF-type receptors, with the other  
297 receptor types included in the analysis occupying an outgroup position (Figure 3).  
298 Furthermore, the echinoderm receptors are not positioned in a clade comprising NPY/NPF-  
299 type receptors but instead they are positioned in a clade comprising sNPF-type receptors,  
300 with bootstrap support of >90 %. Thus, we conclude that the echinoderm receptors are  
301 orthologs of protostome sNPF-type receptors and accordingly we named the *A. rubens*  
302 receptor Ar-sNPF. Furthermore, we hypothesised that this protein may be the receptor for  
303 the *A. rubens* peptide that we have referred to hitherto as ArNPYLP.

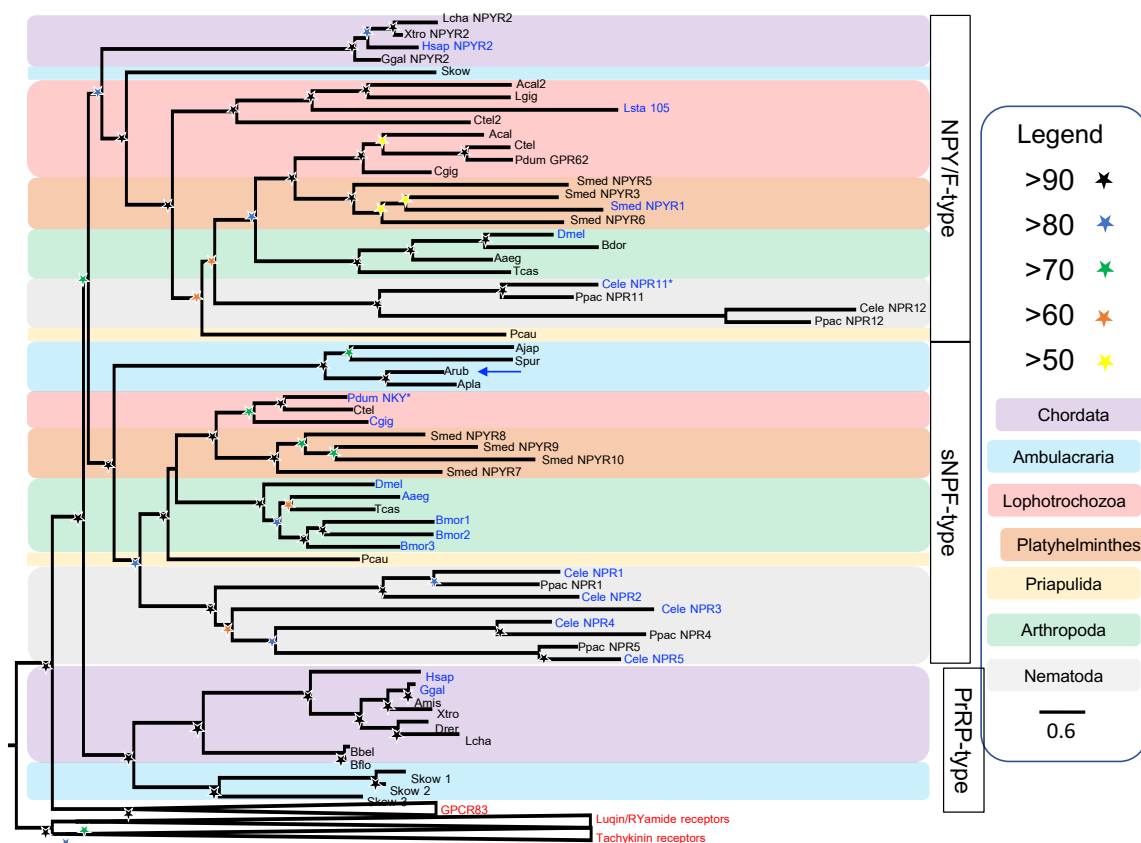

304  
 305 **Figure 3. Phylogenetic tree showing that echinoderm NPY-like receptor proteins are not**  
 306 **orthologs of bilaterian NPY/NPF-type receptors but are orthologs of protostome sNPF-type**  
 307 **receptors.** The tree, which was generated in W-IQ-tree 1.0 using the Maximum likelihood method,  
 308 comprises two distinct clades: a NPY/NPF-type receptor clade and a sNPF-type receptor clade. Also  
 309 included in the tree are prolactin-releasing peptide-type receptors, which are paralogs of NPY-type  
 310 receptors in vertebrates. GPR83-type, luqin-type, and tachykinin-type receptors were included as  
 311 outgroups to root the tree. The stars represent bootstrap support (1000 replicates, see legend) and the  
 312 coloured backgrounds represent different taxonomic groups, as shown in the key. The names with text in  
 313 blue represent the receptors in which ligands have been experimentally confirmed. The asterisks highlight  
 314 receptors where the reported ligand is atypical when compared with ligands for receptors in the same  
 315 clade. The *Asterias rubens* receptor that was characterised in this study (see Figure 4) is labelled with a  
 316 blue arrow. Species names are as follows: Aaeg (*Aedes aegypti*), Acal (*Aplysia californica*), Ajap  
 317 (*Apostichopus japonicus*), Amis (*Alligator mississippiensis*), Apla (*Acanthaster planci*), Arub (*Asterias*  
 318 *rubens*), Bbel (*Branchiostoma belcheri*), Bdor (*Bactrocera dorsalis*), Bflo (*Branchiostoma floridae*),  
 319 Bmor (*Bombyx mori*), Cele (*Caenorhabditis elegans*), Cgig (*Crassostrea gigas*), Ctel (*Capitella teleta*),  
 320 Dmel (*Drosophila melanogaster*), Drer (*Danio rerio*), Ggal (*Gallus gallus*), Hsap (*Homo sapiens*),  
 321 Lcha (*Latimeria chalumnae*), Lgig (*Lottia gigantea*), Lsta (*Lymnaea stagnalis*), Pcau (*Priapulidus*  
 322 *caudatus*), Pdum (*Platynereis dumerilii*), Ppac (*Pristionchus pacificus*), Skow (*Saccoglossus*  
 323 *kowalevskii*), Smed (*Schmidtea mediterranea*), Spur (*Strongylocentrotus purpuratus*), Tcas (*Tribolium*  
 324 *castaneum*), Xtro (*Xenopus tropicalis*). The accession numbers of the sequences used for this  
 325 phylogenetic tree are listed in supplementary table 3.

326

### 327 Pharmacological characterisation of Ar-sNPFR

328 Having identified Ar-sNPFR as a candidate receptor for ArNPYLP, a cDNA encoding  
 329 this receptor was cloned and sequenced (Supplementary Figure 2) and its sequence has been  
 330 deposited in GenBank under accession number MH807444.1. Analysis of the sequence of  
 331 Ar-sNPFR using Protter, revealed seven predicted transmembrane domains, as expected  
 332 for a G-protein coupled receptor (Supplementary Figure 3). The cloned receptor was then

333 co-expressed with Gα16 in CHO-K1 cells expressing apoaeguorin to produce the cell system  
334 CHO-Ar-sNPFR. Synthetic ArNPYLP (pQDRSKAMQAERTGQLRRLNPRF-NH<sub>2</sub>) was  
335 then tested as a candidate ligand for Ar-sNPFR at concentrations ranging from 10<sup>-14</sup> M to  
336 10<sup>-5</sup> M, comparing with cells incubated in assay media without the addition of the peptide.  
337 This revealed that ArNPYLP at a concentration of 10<sup>-5</sup> M triggers luminescence responses  
338 (defined as 100%) in CHO-Ar-sNPFR cells that were approximately five times the  
339 background luminescence detected with the assay media used to dissolve the peptide (Figure  
340 4A), demonstrating that ArNPYLP acts as a ligand for the receptor. Furthermore, ArNPYLP  
341 induced dose-dependent luminescence in CHO-Ar-sNPFR cells with a half-maximal response  
342 concentration (EC<sub>50</sub>) of 1.5 × 10<sup>-10</sup> M (Figure 4B). Importantly, no response to ArNPYLP  
343 was observed in CHO-K1 cells transfected with the vector alone, demonstrating that the  
344 signal observed in CHO-Ar-sNPFR cells exposed to ArNPYLP can be attributed to activation  
345 of the transfected receptor (Supplementary Figure 4). Because ArNPYLP contains a potential  
346 dibasic cleavage site (see underlined arginine residues in its sequence:  
347 pQDRSKAMQAERTGQLRRLNPRF-NH<sub>2</sub>), we hypothesised that the C-terminal  
348 pentapeptide of ArNPYLP (LNPRFamide) may also be generated from ArNPYLP *in vivo*.  
349 Therefore, we also tested synthetic LNPRFamide as a candidate ligand for Ar-sNPFR.  
350 However, this peptide did not induce luminescence responses in CHO-Ar-sNPFR cells  
351 (Figure 4B). So we conclude that the 22-residue amidated peptide ArNPYLP is the natural  
352 ligand for Ar-sNPFR in *A. rubens*. Furthermore, on this basis we changed the name of this  
353 peptide from ArNPYLP to Ar-sNPF.  
354

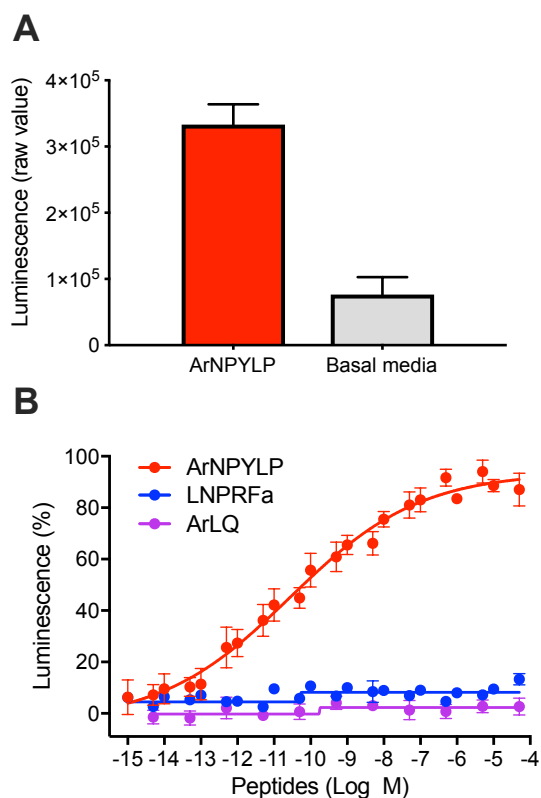

355 **Figure 4. *A. rubens* NPY-like peptide acts as a ligand for a sNPF-type receptor.** (A) The *A. rubens*  
 356 NPY-like peptide ArNPYLP ( $10^{-5}$  M; red bar) triggers luminescence in CHO-K1 cells expressing the *A.*  
 357 *rubens* sNPF-type receptor Ar-sNPF, the promiscuous G-protein  $G_{\alpha 16}$  and the calcium-sensitive  
 358 luminescent GFP-apoaequorin fusion protein G5A. For comparison, the background luminescence of cells  
 359 that were not exposed to ArNPYLP is shown (basal media; grey bar). Mean values ( $\pm$  S.E.M) were  
 360 determined from three independent experiments performed in triplicate (B). Graph showing the selectivity  
 361 of Ar-sNPF as a receptor for ArNPYLP. ArNPYLP causes dose-dependent luminescence in CHO-K1  
 362 cells expressing Ar-sNPF, with an  $EC_{50}$  of 0.15 nM. The receptor is not activated by a C-terminal  
 363 pentapeptide fragment of ArNPYLP (LNPRFa) or by the *A. rubens* luqin-type peptide ArLQ. Each  
 364 point represents mean values ( $\pm$  S.E.M) from at least three independent experiments done in triplicate.  
 365

366  
 367 **Comparison of the sequences of Ar-sNPF and orthologs in other echinoderms with**  
 368 **sNPF-type peptides from other taxa.**

369 Having identified the 22-residue amidated peptide  
 370 pQDRSKAMQAERTGQLRRLNPRF-NH<sub>2</sub> (Ar-sNPF) as the ligand for Ar-sNPF, it was of  
 371 interest to compare the sequences of Ar-sNPF and echinoderm orthologs of this peptide with  
 372 sNPF-type peptides that have been identified in protostome phyla. Therefore, we aligned the  
 373 echinoderm peptides with: i). sNPF-type peptides that have been identified in insects  
 374 (Mertens et al. 2002; Yamanaka et al. 2008; Ma et al. 2017) ii). peptides derived from the  
 375 *Caenorhabditis elegans* FLP-15, FLP-18 and FLP-21 precursor proteins, which are ligands  
 376 for sNPF-type receptors in this species (Kubiak, Larsen, Zantello, et al. 2003; Rogers et al.  
 377 2003; Kubiak et al. 2008; Cohen et al. 2009; Ezcurra et al. 2016), iii). peptides derived from  
 378 the *C. elegans* FLP-3 precursor proteins, which share sequence similarity with peptides  
 379 derived from the *C. elegans* FLP-15, FLP-18 and FLP-21 precursor proteins and iv). peptides  
 380 that have been shown to be ligands for a sNPF-type receptor in the mollusc *Crassostrea gigas*  
 381 (Bigot et al. 2014) and orthologous peptides in other molluscan, annelid and platyhelminth



382 species (Figure 5). This revealed sequence similarities shared between the echinoderm  
383 peptides and sNPF-type peptides in other phyla. For example, the echinoderm peptides  
384 typically have a serine-glycine (SG) motif (or TG in Ar-sNPF, which represents a  
385 conservative substitution) in their central region and this aligns with an N-terminal SG motif  
386 in a sNPF-type peptide from the insect *Tribolium castaneum* and with a serine or glycine  
387 residue in the N-terminal region of other protostome sNPF-type peptides (Figure 5).  
388 Furthermore, the C-terminal region of the echinoderm peptides also shares sequence  
389 similarity with the C-terminal region of protostome sNPF-type peptides. Thus, Ar-sNPF has  
390 the C-terminal sequence LNPRFamide and likewise sNPF-type peptides with a C-terminal  
391 LxxRFamide motif occur in some insect species and sNPF-type peptides with a C-terminal  
392 LxRFamide or LxRYamide (with Y being a conservative substitution) occur in some  
393 molluscan and annelid species. There are, however, also notable differences between the  
394 echinoderm peptides and the protostome sNPF-type peptides. Thus, in addition to obvious  
395 differences in peptide length, many protostome sNPF-type peptides have a conserved proline  
396 residue but this is not a feature of the echinoderm peptides (Figure 5). Finally, a noteworthy  
397 highly variable feature of protostome sNPF-type precursors is the number of neuropeptides  
398 they give rise to. Thus, the echinoderm precursors contain a single neuropeptide, whereas the  
399 number of sNPF-type peptides derived from protostome precursors range from one (*C.*  
400 *elegans* FLP-21, *T. castaneum*), to three or four (e.g. *S. mediterranea*, *D. melanogaster*, *C.*  
401 *gigas*) to as many as seven (e.g. *C. elegans* FLP3, *P. dumerilii*).

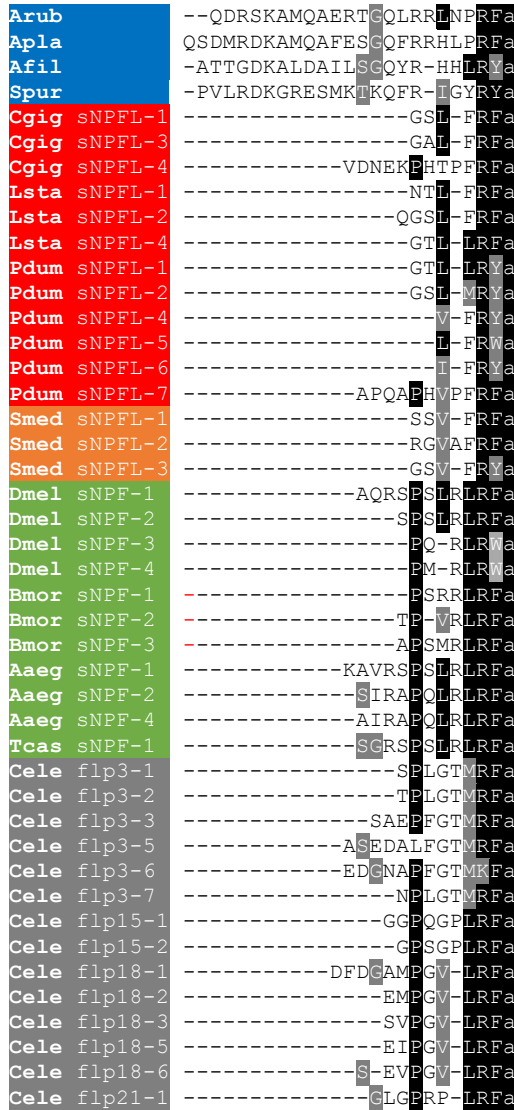

402  
 403 **Figure 5. Comparison of the sequences of Ar-sNPF and orthologs from other echinoderms with**  
 404 **protostome sNPF-type peptides.** Conserved residues are highlighted in black or grey. Species names are  
 405 highlighted in phylum-specific or superphylum-specific colours: blue (Echinodermata), red  
 406 (Lophotrochozoa), orange-red (Platyhelminthes), green (Arthropoda) and grey (Nematoda). Species names  
 407 are as follows: Aaeg (*Aedes aegypti*), Afil (*Amphiura filiformis*), Apla (*Acanthaster planci*), Arub  
 408 (*Asterias rubens*), Bmor (*Bombyx mori*), Cele (*Caenorhabditis elegans*), Cgig (*Crassostrea gigas*), Dmel  
 409 (*Drosophila melanogaster*), Lsta (*Lymnaea stagnalis*), Oara (*Ophiopsila aranea*), Pdum (*Platynereis*  
 410 *dumerilii*), Smed (*Schmidtea mediterranea*), Spur (*Strongylocentrotus purpuratus*), Tcas (*Tribolium*  
 411 *castaneum*). The accession numbers of the sequences included in this alignment are listed in  
 412 supplementary table 4.

413  
 414  
 415 **Comparison of the structure of genes encoding precursors of sNPF-type peptides**  
 416 Having identified the 22-residue amidated peptide  
 417 pQDRSKAMQAERTGQLRRLNPRF-NH<sub>2</sub> (Ar-sNPF) as the ligand for Ar-sNPF, it was  
 418 also of interest to compare the structure of genes encoding orthologs of this peptide in  
 419 echinoderms for which genome sequence data are available with the structure of genes  
 420 encoding sNPF-type peptides in protostomes (Figure 6). Consistent with the variability in the

421 number of neuropeptides derived from sNPF-type precursors, we found that the structure of  
 422 the genes encoding these proteins was also highly variable. Thus, the number of introns  
 423 interrupting the coding sequence ranges from one in the starfish *A. planci* and in the mollusc  
 424 *C. gigas* to as many as five in the *C. elegans* FLP-15 precursor gene. However, a consistent  
 425 feature is the presence of an intron located after the protein-coding exon(s) that encode the N-  
 426 terminal signal peptide. It is noteworthy that in the echinoderm precursor genes this intron  
 427 interrupts the coding sequence for the sNPF-type peptide, whereas in protostome sNPF-type  
 428 genes the coding sequences for sNPF-type peptides are located 3' to this intron. This intron  
 429 may be an evolutionarily conserved feature of sNPF-type precursor genes in the Bilateria, but  
 430 with there being a shift in the position of the cleavage site that precedes the sNPF-type  
 431 neuropeptide in echinoderm precursor proteins. A shift N-terminally in the location of the  
 432 cleavage site would also explain why echinoderm sNPF-type peptides are longer than  
 433 protostome sNPF-type peptides. Alternatively, the structure of genes encoding sNPF-type  
 434 precursors in echinoderms might represent the ancestral condition in the Bilateria, and the  
 435 occurrence of shorter sNPF-type peptides in protostomes could be explained by a C-  
 436 terminally directed shift in the cleavage site that precedes the first or only neuropeptide  
 437 derived from sNPF-type precursors.  
 438

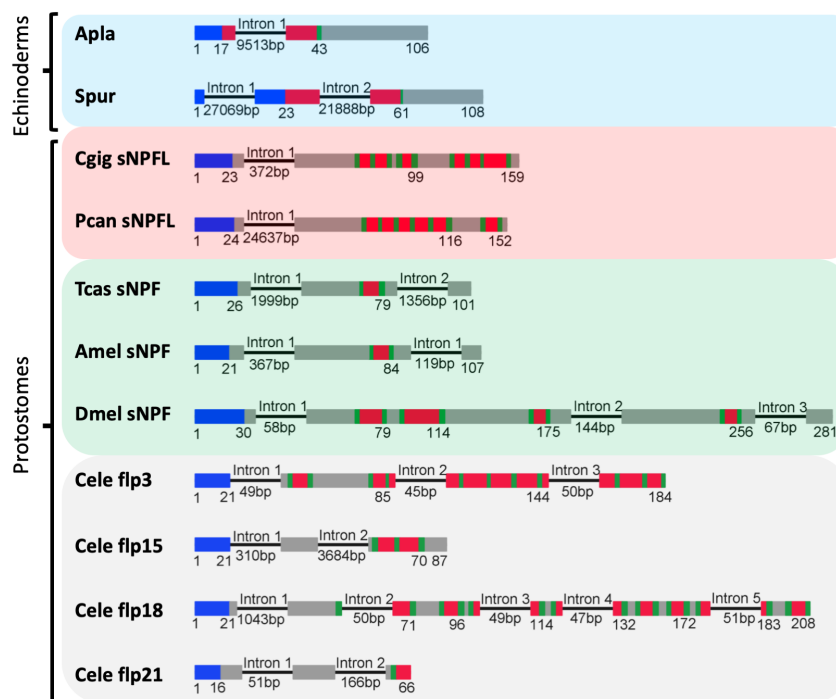

439  
 440 **Figure 6. Comparison of the exon/intron structure of genes encoding echinoderm orthologs of the**  
 441 **Ar-sNPF precursor and genes encoding protostome sNPF-type precursors.** Schematic representations  
 442 of the gene structures are shown, with protein-coding exons shown as rectangles and introns shown as  
 443 lines (with intron length stated underneath). The protein-coding exons are colour-coded to show regions  
 444 that encode the N-terminal signal peptide (blue), the neuropeptide(s) (red), monobasic or dibasic cleavage  
 445 sites (green) and other regions of the precursor protein (grey). The coloured backgrounds label the  
 446 following the taxonomic groups: echinoderms (blue), lophotrochozoa (red), arthropods (green) and  
 447 nematodes (grey). Species abbreviations: Apla (*Acanthaster planci*), Spur (*Strongylocentrotus*  
 448 *purpuratus*), Cgig (*Crassostrea gigas*), Pcan (*Pomacea canaliculata*), Tcas (*Tribolium castaneum*), Amel  
 449 (*Apis mellifera*), Dmel (*Drosophila melanogaster*), Cele (*Caenorhabditis elegans*). The accession numbers  
 450 for the sequences of the precursors shown in this figure are listed in supplementary table 5.

451 **Comparison of the sequences of echinoderm sNPF-type peptides with related peptides**  
452 **in other invertebrate deuterostomes and with vertebrate prolactin-releasing peptides**

453 Based on a cluster analysis of neuropeptide receptor relationships, it has been  
454 proposed previously that protostome sNPF-type signalling may be orthologous to vertebrate  
455 prolactin-releasing peptide (PrRP)-type signalling (Jékely 2013). With our discovery of  
456 sNPF-type precursors and peptides in echinoderms, a new opportunity to investigate this  
457 proposed relationship was provided. Thus, it is noteworthy that echinoderm sNPF-type  
458 peptides (22-25 residues) are similar in length to vertebrate PrRPs, which are 20-31 residues  
459 as full-length peptides and in some species can occur as N-terminally truncated peptides due  
460 the presence of a monobasic cleavage site (Hinuma et al. 1998; Tachibana and Sakamoto  
461 2014). Furthermore, by analysing sequence data from the hemichordate *S. kowalevskii* and  
462 the cephalochordate *B. floridae* here we identified novel neuropeptides that share sequence  
463 similarity with echinoderm sNPF-type peptides and with vertebrate PrRPs (Figure 7A). Thus,  
464 sequence alignment reveals that, in addition to a shared characteristic of a C-terminal  
465 RFamide or a RYamide (Y and F being synonymous substitutions), there are thirteen other  
466 residues in chordate PrRPs that are identical or structurally similar to equivalently positioned  
467 residues in at least one of the echinoderm sNPF-type peptides or the hemichordate PrRP-like  
468 peptides, as highlighted by the asterisks in Figure 7A. Thus, the discovery of echinoderm  
469 sNPF-type peptides and related peptides in other invertebrate deuterostomes has provided  
470 important new evidence that is supportive of the hypothesis that protostome sNPF-type  
471 neuropeptides and vertebrate PrRPs are orthologous.

472  
473 **Comparison of the structure of genes encoding echinoderm sNPF-type peptides,**  
474 **vertebrate prolactin-releasing peptides and related peptides in other invertebrate**  
475 **deuterostomes**

476 Having found that echinoderm sNPF-type peptides share sequence similarity with  
477 vertebrate PrRPs, we also compared the structure of genes encoding the precursors of these  
478 peptides (Figure 7B). This revealed that a common characteristic is the presence of an intron  
479 that interrupts the coding sequence at a position corresponding to the N-terminal or central  
480 region of the echinoderm sNPFs and vertebrate PrRPs. Furthermore, in both echinoderm  
481 sNPF-type genes and vertebrate PrRP genes the intron interrupts the coding sequence in the  
482 same frame, at a position between the first and second nucleotide of the interrupted codon,  
483 which is denoted by +1 in Figure 7B. Genes encoding novel precursors of PrRP-like peptides  
484 in *S. kowalevskii* and *B. floridae* also have an intron in the +1 frame. Furthermore, in the *B.*  
485 *floridae* gene and in one of the *S. kowalevskii* genes (Skow 2) the intron is located in the  
486 region of the gene encoding the N-terminal part of the neuropeptide, whereas in the other *S.*  
487 *kowalevskii* gene (Skow1) the intron is located in a region encoding the C-terminal part of the  
488 neuropeptide. The presence of a conserved intron in the same frame in echinoderm sNPF-  
489 type genes, the two *S. kowalevskii* PrRP-like neuropeptide precursor genes and chordate  
490 PrRP-type genes supports the hypothesis that echinoderm sNPF-type neuropeptides are  
491 orthologs of hemichordate PrRP-like and chordate PrRP-type neuropeptides.

492

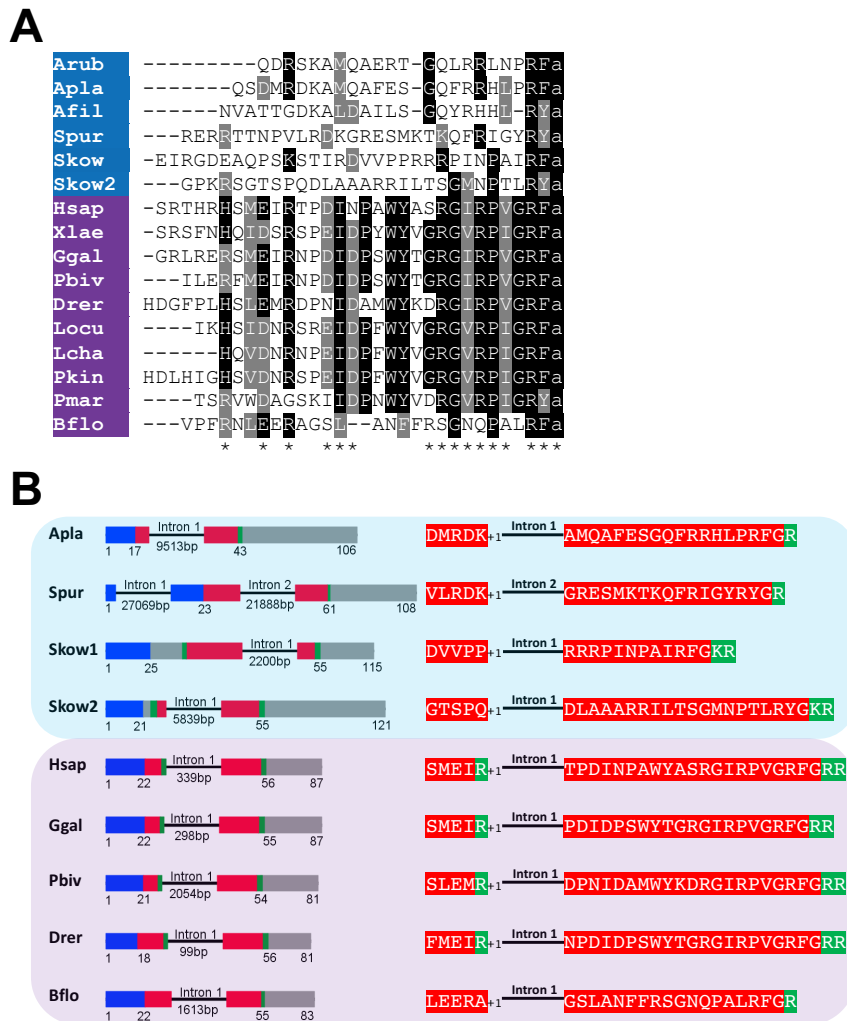

493  
494  
495  
496  
497  
498  
499  
500  
501  
502  
503  
504  
505  
506  
507  
508  
509  
510  
511  
512  
513  
514  
515  
516

**Figure 7. Comparison of the sequences and gene structure of echinoderm sNPF peptides, chordate prolactin-releasing peptides (PrRP) and PrRP-like peptides in the hemichordate *S. kowalevskii*.** A) Sequence alignment of echinoderm sNPF-type peptides with chordate PrRP-type peptides and PrRP-like peptides in the hemichordate *S. kowalevskii*. Conserved residues are highlighted in black or grey. The asterisks indicate residues that are conserved between chordate (purple) PrRP-type peptides and at least one of the ambulacrarian (blue) peptides. B) Comparison of exon/intron structure of genes encoding echinoderm precursors of sNPF-type peptides, hemichordate precursors of PrRP-like peptides and chordate PrRP-type peptides. Schematic representations of the gene structures are shown, with protein-coding exons shown as rectangles and introns shown as lines (with intron length stated underneath). The protein-coding exons are colour-coded to show regions that encode the N-terminal signal peptide (blue), the neuropeptide(s) (red), monobasic or dibasic cleavage sites (green) and other regions of the precursor protein (grey). Note that a common characteristic is that an intron interrupts the coding sequence in the N-terminal or central region of the neuropeptide, with the intron consistently located between the first and second nucleotides (represented by the +1) of the codon for the amino acid shown after intron. Species are highlighted in clade-specific colours: blue (Ambulacraria), purple (Chordata). Species names are as follows: Arub (*Asterias rubens*), Apla (*Acanthaster planci*), Afil (*Amphiura filiformis*), Spur (*Strongylocentrotus purpuratus*), Skow, (*Saccoglossus kowalevskii*), Hsap (*Homo sapiens*), Xlae (*Xenopus laevis*), Ggal (*Gallus gallus*), Pbiv (*Python bivittatus*), Drer (*Danio rerio*), Lcha (*Latimeria chalumnae*), Locu (*Lepisosteus oculatus*), Pkin (*Paramormyrops kingsleyae*), Pmar (*Petromyzon marinus*), Bflo (*Branchiostoma floridae*). The accession numbers of the sequences included in this alignment are listed in supplementary table 6.

## 517 **Discussion**

518

### 519 **NPY-like peptides in echinoderms are not orthologs of NPY/NPF-type neuropeptides**

520 Precursors of peptides that share sequence similarity with members of the bilaterian  
521 NPY/NPF-type neuropeptide family were discovered recently in the phylum Echinodermata  
522 (Zandawala et al. 2017). These include proteins identified in several brittle star species (class  
523 Ophiuroidea) and the starfish species *Asterias rubens* and *Patiria miniata* (class Asteroidea).  
524 Here we report the cloning and sequencing of a cDNA encoding the precursor of the NPY-  
525 like peptide in *A. rubens*. Furthermore, the primary structure of this peptide (ArNPYLP) was  
526 determined using mass spectrometry, demonstrating that it is a twenty two-residue amidated  
527 peptide with an N-terminal pyroglutamate. However, comparison of the sequences of  
528 ArNPYLP and related peptides from other echinoderms with NPY/NPF-type neuropeptides  
529 from other bilaterians revealed some striking differences. Most notable is that the echinoderm  
530 peptides lack two conserved proline residues that are present in the majority of NPY/NPF-  
531 type neuropeptides that have been identified in other bilaterians. These prolines form part of  
532 what is known as the polyproline-helix or polyproline-fold, which interacts with other  
533 conserved residues (a leucine residue and two tyrosine residues) that have been shown to be  
534 important in determining the three-dimensional structure of NPY-type peptides in vertebrates  
535 (Blundell et al. 1981; Glover et al. 1983; Glover et al. 1984). Furthermore, it has been shown  
536 that these residues in human NPY are important for receptor activation (Schwartz et al. 1990;  
537 Keire et al. 2000; Nygaard et al. 2006). Although there have been no structural studies on  
538 NPF-type peptides from protostomes, our alignment (Figure 1) reveals that residues  
539 important in determining the secondary structure of vertebrate NPYs are conserved in  
540 protostome NPFs. For example, the Y/F residue in position 24, the I/L residue in position 28  
541 and the Y residue in position 31 are conserved in both NPF-type and NPY-type peptides.  
542 These residues have been shown to be important for the formation of the three-dimensional  
543 structure in vertebrate NPY-type peptides (Blundell et al. 1981; Glover et al. 1983; Glover et  
544 al. 1984) so these residues may likewise be important for NPF receptor activation and NPF  
545 bioactivity. Furthermore, these conserved residues are also present in an NPY/NPF-type  
546 peptide that has been identified in *S. kowalevskii*, a species belonging to the phylum  
547 Hemichordata, which is a sister phylum to the Echinodermata in the ambulacrarian clade of  
548 the Bilateria (Mirabeau and Joly 2013; Elphick and Mirabeau 2014). The absence of these  
549 conserved residues in the NPY/NPF-like peptides that have been identified in *A. rubens* and  
550 other echinoderms suggests, therefore, that these peptides are not orthologs of NPY-type  
551 neuropeptides.

552 Our analysis of the structure of genes encoding the echinoderm NPY-like peptides  
553 provided further evidence that these peptides are not orthologs of NPY-type neuropeptides.  
554 Previous studies have compared the structure of genes encoding vertebrate NPY-type  
555 peptides and invertebrate NPF-type peptides (Blomqvist et al. 1992; Mair et al. 2000).  
556 Specifically, comparison of the structure of the human NPY precursor gene with the structure  
557 of the gene encoding the NPF precursor in the platyhelminth *Moniezia expansa* revealed that  
558 in both genes the first protein-coding exon encodes the N-terminal signal peptide and most of  
559 the NPY/NPF-type peptide through to the first two nucleotides of the codon for the



560 penultimate residue, an arginine residue. The next exon contains the third nucleotide of the  
561 arginine codon and codons for i) a C-terminal tyrosine (in the case of the human NPY gene)  
562 or a C-terminal phenylalanine (in the case of *M. expansa* NPF gene), ii). a glycine residue  
563 that is a substrate for C-terminal amidation, iii). a dibasic cleavage site (KR) and iv). part of  
564 the C-terminal region of the precursor protein (Mair et al. 2000). Here we expanded  
565 comparative analysis of NPY/NPF gene structure to include other bilaterians. We found that  
566 a gene structure in which most of NPY/NPF-type neuropeptide sequence is encoded in one  
567 exon and the C-terminal F or Y and the amidation and cleavage sites are in the next exon is a  
568 highly conserved feature of NPY/NPF genes, which is seen in vertebrates, cephalochordates,  
569 hemichordates, lophotrocozoans, priapulids, arthropods and nematodes. Therefore, our  
570 finding that this is not a feature of genes encoding the NPY/NPF-like peptides in  
571 echinoderms (the starfish *A. planici* and the sea urchin *S. purpuratus*) provides important  
572 further evidence that these peptides are not orthologs of NPY/NPF-type neuropeptides.

573

### 574 **Discovery of sNPF-type neuropeptide signalling in echinoderms**

575 If the echinoderm NPY/NPF-like peptides are not orthologs of the NPY/NPF-type  
576 neuropeptide family, then a logical prediction would be that orthologs of receptors for  
577 NPY/NPF-type neuropeptides are also absent in echinoderms, because analysis of  
578 neuropeptide-receptor co-evolution in the Bilateria has revealed that loss of a neuropeptide in  
579 an animal lineage is invariably accompanied by loss of its cognate receptor (Mirabeau and  
580 Joly 2013). Therefore, we performed a detailed phylogenetic analysis of sequence data to  
581 address this issue. Consistent with our prediction, orthologs of bilaterian NPY/NPF-type  
582 receptors were not found in any of the echinoderm species analysed. However, we discovered  
583 that *A. rubens* and other echinoderms do have orthologs of sNPF-type receptors, paralogs of  
584 the NPY-type receptors that hitherto have only been characterised in protostomes. Therefore,  
585 we hypothesised that the echinoderm NPY-like peptides may act as ligands for sNPF-type  
586 receptors and performed experimental studies to test this hypothesis. Having identified a  
587 transcript encoding a sNPF-type receptor in the starfish *A. rubens* (Ar-sNPFR), we cloned a  
588 cDNA encoding this receptor and expressed it in CHO-K1 cells. Then the *A. rubens* NPY-  
589 like peptide (ArNPYLP) was tested as a candidate ligand for Ar-sNPFR. This revealed that  
590 ArNPYLP causes dose-dependent activation of the Ar-sNPFR with an EC<sub>50</sub> value of 0.15  
591 nM, demonstrating that it is a potent ligand for this receptor. Evidence of the specificity of  
592 peptide-receptor pairing was established by our finding that other peptides, including a C-  
593 terminal fragment of ArNPYLP (LNPRFamide) and the *A. rubens* luqin-type neuropeptide  
594 ArLQ (Yañez-Guerra et al. 2018), do not act as ligands for Ar-sNPFR. Therefore, we  
595 conclude that the twenty two-residue neuropeptide formerly referred to as ArNPYLP is the  
596 natural ligand for the *A. rubens* sNPF-type receptor Ar-sNPFR and therefore this peptide  
597 should be renamed Ar-sNPF. Our discovery of the Ar-sNPF – Ar-sNPFR signalling system in  
598 *A. rubens* is important because this is the first sNPF-type signalling system to be identified in  
599 a deuterostome. Thus, sNPF-type signalling is not unique to protostomes, as has been  
600 suggested previously, and the evolutionary origin of this signalling system can be traced back  
601 to the common ancestor of the Bilateria.

602 Our discovery of sNPF-type signalling in a deuterostome, the starfish *A. rubens*  
603 (Phylum Echinodermata) and our and previous (Mirabeau and Joly 2013) phylogenetic

604 analyses of neuropeptide receptor relationships indicates that sNPF-type and NPY/NPF-type  
605 signalling are paralogous. Thus, we can infer that gene duplication in a common ancestor of  
606 the Bilateria gave rise to paralogous NPY/NPF-type and sNPF-type precursor genes and  
607 paralogous NPY/NPF-type and sNPF-type receptor genes. In this context, by analysing the  
608 phylogenetic distribution and sequences of NPY/NPF-type and sNPF-type precursors and  
609 receptors, the evolutionary history of these signalling systems in the Bilateria can be  
610 examined and reconstructed.

611

### 612 **Reconstructing the evolution of NPY/NPF-type neuropeptide signalling**

613 Our analysis and previous analysis (Mirabeau and Joly 2013) of the phylogenetic  
614 distribution of NPY/NPF-type signalling indicates that this neuropeptide system has been  
615 widely preserved and is highly conserved in the Bilateria, with relatively few instances of  
616 loss based on the data currently available (Figure 8). Thus, genes encoding NPY/NPF-type  
617 precursors and genes encoding proven or candidate receptors for NPY/NPF-type peptides  
618 have been identified in deuterostomes (vertebrates, hemichordates) and protostomes  
619 (platyhelminthes, annelids, molluscs, arthropods). Furthermore, here we report the first  
620 identification of genes encoding a NPY/NPF-type precursor and a NPY/NPF-type receptor in  
621 the protostome phylum Priapulida. It is noteworthy that NPY/NPF-type signalling has only  
622 been partially characterised in a model invertebrate system – the nematode *C. elegans*. Our  
623 phylogenetic analysis indicates that there are two *C. elegans* receptors that are orthologs of  
624 NPY/NPF-type receptors: NPR-12, which is an orphan receptor, and NPR-11, which has  
625 been shown to be activated by the peptide MDANAFRMSFamide (Chalasan et al. 2010).  
626 However, this peptide shares little sequence similarity with NPY/NPF-type peptides from  
627 other bilaterians. Furthermore, receptor assays only showed activation at peptide  
628 concentrations of 10 and 30  $\mu$ M (Chalasan et al. 2010), which are high when compared to  
629 other reported NPY/NPF-type receptors that are typically activated in the nanomolar range  
630 (Bard et al. 1995; Lundell et al. 1997; Garczynski et al. 2002; Saberi et al. 2016). Recently,  
631 based on similarity-based sequence alignments, it has been suggested that the mature peptide  
632 derived from the *C. elegans* protein FLP-27 may be an ortholog of NPY/NPF-type peptides  
633 (Fadda et al. 2019). Here, our analysis of the structure of the gene encoding the FLP-27  
634 precursor has revealed that it has the characteristic structure of NPY/NPF-type genes, with an  
635 intron interrupting the codon for the C-terminal arginine of the NPF-type peptide sequence.  
636 Thus, based on our analysis of *C. elegans* sequence data, we conclude that the NPY/NPF-  
637 type peptide derived from the FLP-27 precursor protein is likely to act as a ligand for the  
638 NPR-11 and/or NPR-12 receptors.

639 The first NPF-type peptide was discovered in the platyhelminth *Moniezia expansa*  
640 (Maule et al. 1991), but the receptor for this ligand has not been identified. We were unable  
641 to identify a candidate receptor for NPF in *M. expansa*, which probably reflects the limited  
642 availability of sequence data for this species. However, genome/transcriptome sequence data  
643 are available for the flatworm species *S. mediterranea* and an expanded family of sixteen  
644 putative NPY/NPF-type receptors (*Smed-NPYR1* - *Smed-NPYR16*) in this species has been  
645 reported (Saberi et al. 2016). Conversely, our phylogenetic analysis (Figure 2) has revealed  
646 that only *Smed-NPYR1*, *Smed-NPYR3*, *Smed-NPYR5* and *Smed-NPYR6*, are orthologs of

647 the NPY/NPF-type family of receptors. Accordingly, it has been shown that Smed-NPYR1 is  
648 activated by a peptide that has a characteristic NPY/NPF-type structure (Saber et al. 2016).

649 In the annelid *P. dumerilii*, a receptor named NPY-4 receptor 1 that is activated by  
650 three NPY/NPF-type peptides (NPY1, NPY3 and NPY4) has been reported previously.  
651 However, cluster analysis indicated that this receptor may not be an NPY/NPF-type receptor  
652 (Bauknecht and Jékely 2015). Interestingly, we have identified an NPF-type precursor and  
653 peptide in *P. dumerilii* that has not been reported previously and which contains residues that  
654 are conserved in NPF-type peptides from other protostomes (Figure 1). Furthermore, the  
655 exon/intron structure of a gene encoding an ortholog of the *P. dumerilii* NPF-type precursor  
656 in the annelid *Helobdella robusta* is consistent with NPY/NPF-type precursor genes (Figure  
657 2). It is likely, therefore, that the NPF-type peptide in *P. dumerilii* is the ligand for the orphan  
658 receptor GPR62, which is clearly an ortholog of NPY/NPF-type receptors (Figure 3).

659 Although NPY/NPF-type signalling has been retained in the majority of phyla, as  
660 discussed above, it has been reported previously that NPY/NPF-type signalling has been lost  
661 in urochordates (Mirabeau and Joly 2013). Furthermore, here we present evidence for the  
662 first time indicating that NPY/NPF-type signalling has also been lost in echinoderms. The  
663 functional significance of the loss of NPY/NPF-type signalling in urochordates and  
664 echinoderms is unknown. However, insights into this issue may emerge as we learn more  
665 about the physiological roles of NPY/NPF-type signalling in a variety of invertebrate taxa.

666

### 667 **Reconstructing the evolution of sNPF-type neuropeptide signalling**

668 Discovery of sNPF-type neuropeptide signalling in echinoderms is interesting because  
669 orthologs of protostome sNPF-type receptors have not been identified in other deuterostome  
670 phyla – Chordata and Hemichordata. Conversely, both peptides and receptors of the sNPF-  
671 type signalling system have been identified in several protostome phyla (Figure 8). In this  
672 context, it is of interest to first review here what is currently known about the molecular  
673 components of the sNPF-type signalling system in protostomes.

674 Starting with the ecdysozoan protostomes, it was originally thought that sNPF-type  
675 signalling may be arthropod-specific, reflecting the original discovery of this signalling  
676 system in insects (Nässel and Wegener 2011). However, a large-scale phylogenetic analysis  
677 of G-protein coupled neuropeptide receptors in the Bilateria revealed an expanded family of  
678 genes encoding sNPF-type receptors in the nematode *C. elegans* (Mirabeau and Joly 2013).  
679 Our phylogenetic analysis confirms the existence of an expanded family of sNPF-type  
680 receptors in *C. elegans* (Figure 2). Furthermore, we show that the *C. elegans* receptors NPR1,  
681 NPR2, NPR3, NPR4 and NPR5, which are activated by sNPF-type peptides derived from the  
682 FLP-15, FLP-18 and FLP-21 precursors (Kubiak, Larsen, Nulf, et al. 2003; Kubiak, Larsen,  
683 Zantello, et al. 2003; Rogers et al. 2003; Kubiak et al. 2008; Cohen et al. 2009; Ezcurra et al.  
684 2016), form part of a clade of sNPF-type receptors, together with deorphanised sNPF-type  
685 receptors from the insects *D. melanogaster* (Mertens et al. 2002), *B. mori* (Yamanaka et al.  
686 2008; Ma et al. 2017) and *A. aegypti* (Christ et al. 2018). Previously, NPR1, NPR2 and NPR5  
687 were annotated as NPY/NPF-type receptors and NPR3 and NPR4 were annotated as  
688 NPY/NPF-like receptors (Cardoso et al. 2012) but it is now clear that NPR1-5 are in fact  
689 sNPF-type receptors. Hitherto the existence of sNPF-type signalling in priapulids has not  
690 been reported. Here our analysis of sequence data from *Priapulid caudatus* has identified an

691 sNPF-type receptor but we did not identify a precursor protein that gives rise to a candidate  
692 ligand for this receptor and therefore this is an objective for future work.

693 Turning to the spiralian protostomes, sNPF-type receptors were identified in molluscs,  
694 annelids and platyhelminths (Figure 2, 8). However, the peptide ligand(s) for sNPF-type  
695 receptors have only been demonstrated experimentally in a single molluscan species – the  
696 bivalve *C. gigas* (Bigot et al. 2014), although orthologs of these peptides were functionally  
697 characterised in other molluscan species prior to this (Hoek et al. 2005; Zatylny-Gaudin et al.  
698 2010; Zhang et al. 2012). Interestingly our phylogenetic analysis (Figure 2) revealed that a  
699 clade comprising spiralian molluscan sNPF-type receptors also contains a receptor from the  
700 annelid *Platynereis dumerilli* that has been experimentally characterised as a receptor that is  
701 activated by the amidated tetrapeptide FMRFamide and a peptide known as NKY (Bauknecht  
702 and Jékely 2015). Furthermore, the NKY peptide and the NKY receptors have been described  
703 as paralogs of NPY-type peptides and NPY-type receptors, respectively (Bauknecht and  
704 Jékely 2015). Although our phylogenetic analysis indicates that the *C. gigas* sNPF receptor  
705 and the *P. dumerilli* NKY receptor are orthologs, there is a discrepancy in the ligands that  
706 activate these two receptors. The *C. gigas* sNPF-type receptor is activated by a sNPF-type  
707 peptide comprising five to six residues and with a C-terminal LFRFamide sequence (Bigot et  
708 al. 2014), whereas the *P. dumerilli* NKY receptor was shown to be activated by NKY-type  
709 peptides that are typically up to forty-three residues in length and with a C-terminal  
710 LLRYamide sequence (Bauknecht and Jékely 2015). Therefore, although it was not the  
711 primary purpose of this study, we investigated this anomaly by comparing the ability of three  
712 peptides to act as ligands for the *C. gigas* sNPF receptor: i). the peptide GSLFRFamide,  
713 which has been shown previously to act as a ligand for this receptor (Bigot et al. 2014), ii).  
714 the amidated tetrapeptide FMRFamide and iii). a *C. gigas* NKY-type peptide. This  
715 experiment revealed that GSLFRFamide is the most potent ligand of this receptor, with an  
716 EC<sub>50</sub> value of 31 nM (Supplementary Figure 5). Interestingly, however, we found that the *C.*  
717 *gigas* NKY-type peptide and FMRFamide also cause activation of the receptor, but only at  
718 relatively high concentrations. Thus, the EC<sub>50</sub> for FMRFamide was 3.4 μM and the EC<sub>50</sub> for  
719 the *C. gigas* NKY-type peptide was 3.02 μM. We conclude from this that GSLFRFamide is a  
720 natural ligand for the *C. gigas* sNPF receptor, consistent with the findings of (Bigot et al.  
721 2014), whereas the ability of FMRFamide and the *C. gigas* NKY-type peptide to activate the  
722 *C. gigas* sNPF-type receptor may reflect non-physiological neuropeptide-receptor cross-talk.  
723 Accordingly, the *P. dumerilli* receptor identified as a receptor for NKY (Bauknecht and  
724 Jékely 2015) may be activated physiologically by shorter sNPF-type GSLFRFamide-like  
725 peptides, the sequences of which we show in the alignment in Figure 5 (e.g. GTLLRYamide,  
726 GSLMRYamide etc.). It is noteworthy that the C-terminal tetrapeptide of GTLLRYamide is  
727 similar to the C-terminal tetrapeptide of *P. dumerilli* NKY-1 (IMRYamide), which likely  
728 explains why NKY was found to act as a ligand, albeit with an EC<sub>50</sub> of 420 nM, for a *P.*  
729 *dumerilli* NKY/sNPF receptor (Bauknecht and Jékely 2015). Further studies are now needed  
730 to investigate the ligand-binding properties of the *P. dumerilli* NKY/sNPF receptor in more  
731 detail.

732 As highlighted above, an expanded family of sixteen putative NPY/NPF-type receptors  
733 (*Smed-NPYR1* - *Smed-NPYR16*) has been identified in the platyhelminth *S. mediterranea*  
734 (Saber et al. 2016). However, our phylogenetic analysis indicates that four of these receptors



735 (*Smed-NPYR7*, *Smed-NPYR8*, *Smed-NPYR9*, and *Smed-NPYR10*) are orthologs of sNPF-  
736 type receptors. Therefore, it would be expected that the peptide ligands for these receptors are  
737 similar to the peptides that have been identified as ligands for sNPF-type receptors in another  
738 spiralian – the mollusc *C. gigas* (Bigot et al. 2014). On this basis, we have identified  
739 candidate ligands for *S. mediterranea* sNPF-type receptors, which are included in the  
740 alignment shown in Figure 5 (SSVFRFamide, RGVAFRFamide and GSVFRYamide).

741 Having reviewed the characteristics of sNPF-type signalling in protostomes, it is of  
742 interest to make comparisons with the sNPF-type signalling system that has been identified  
743 here for the first time in a deuterostome phylum – the Echinodermata. Alignment of the  
744 sequences of protostome sNPF-type peptides with the echinoderm sNPF-type peptides  
745 reveals modest C-terminal sequence similarity, as shown in Figure 5 and as described in the  
746 results section of this paper. Furthermore, the echinoderm sNPF-type peptides are much  
747 longer than protostome sNPF-type peptides. Another difference is that protostome sNPF-type  
748 neuropeptide precursors typically give rise to multiple sNPF-type peptides, whereas in  
749 echinoderms the sNPF-type precursor contains a single sNPF-type peptide that is located  
750 adjacent to the signal peptide. Likewise, comparison of the structure of the genes encoding  
751 sNPF-type precursors in protostomes and echinoderms reveals limited similarity (Figure 6).  
752 Thus, there is little evidence of orthology from comparison of the neuropeptide, precursor  
753 and gene sequences in protostomes and echinoderms. Consequently, our conclusion that the  
754 echinoderm NPY-like peptides are orthologs of protostome sNPF-type peptides is principally  
755 based on the orthology of their receptors, as shown in Figure 3. It is important to note,  
756 however, that this is not unprecedented in investigations of the evolution neuropeptide  
757 signalling. Thus, whilst the sequences of some neuropeptides and neuropeptide precursors are  
758 highly conserved throughout the Bilateria, others are so divergent that they can be  
759 unrecognisable as orthologs. An example of the former are vasopressin/oxytocin (VP/OT)-  
760 type neuropeptides and precursors. An example of the latter are neuropeptide-S  
761 (NPS)/crustacean cardioactive peptide (CCAP)-type neuropeptides and precursors, which are  
762 paralogs of VP/OT-type neuropeptides and precursors (Semmens et al. 2015). Thus, by way  
763 of comparison, NPY/NPF-type neuropeptides are similar to VP/OT-type neuropeptides in  
764 exhibiting a high level of sequence conservation throughout the Bilateria. Conversely, sNPF-  
765 type neuropeptides are similar to NPS/CCAP-type neuropeptides in being highly divergent,  
766 with neuropeptides in protostomes and deuterostomes exhibiting modest sequence similarity.

767 The discovery of sNPF-type signalling in echinoderms has provided a unique  
768 opportunity to speculate on the ancestral characteristics of this signalling system in  
769 Urbilateria. It is noteworthy that, by comparison with the protostome sNPF-type peptides, the  
770 echinoderm sNPF-type peptides have more features in common with the paralogous  
771 NPY/NPF-type peptides. The echinoderm sNPF-type peptides are not as long as NPY/NPF-  
772 type peptides but they are nevertheless much longer than protostome sNPF-type peptides.  
773 Furthermore, it was the sequence similarity that echinoderm peptides share with NPY/NPF-  
774 type peptides that originally facilitated their discovery (Zandawala et al., 2017). Additionally,  
775 the structure of the echinoderm sNPF-type precursors is similar to NPY/NPF-type precursors  
776 because the neuropeptide is located immediately after the signal peptide, whereas this is not a  
777 feature of protostome sNPF-type precursors. Based on these observations, we propose that  
778 echinoderm sNPF-type peptides and precursors may more closely resemble the ancestral

779 characteristics of this signalling system in Urbilateria. Furthermore, we speculate that the  
780 common ancestor of the paralogous NPY/NPF-type and sNPF-type neuropeptide precursors  
781 may have been similar to NPY/NPF-type precursors with respect peptide, precursor and gene  
782 structure. Then, following gene duplication, these ancestral characteristics were retained in  
783 the paralog that gave rise to the bilaterian NPY/NPF-type peptides/precursors. In contrast, the  
784 paralog that gave rise to sNPF-type signalling diverged from the ancestral condition.  
785 However, the extent of divergence varies in the echinoderm and protostome lineages. In  
786 echinoderms, the sNPF-type peptides/precursors have many NPY/NPF-type characteristics  
787 and we conclude that this reflects less divergence from the proposed ancestral condition.  
788 Conversely, in the protostomes, the sNPF-type peptides/precursors exhibit little similarity  
789 with NPY/NPF-type peptides/precursors and we conclude that this reflects more divergence  
790 from the proposed ancestral condition.

791 Lastly, we need to consider more broadly the evolutionary history of sNPF-type  
792 signalling in deuterostomes, and in particular the non-echinoderm phyla – the hemichordates  
793 and chordates. A detailed phylogenetic analysis of G-protein coupled neuropeptide receptors  
794 in the Bilateria did not reveal the presence of orthologs of protostome sNPF-type receptors in  
795 hemichordates and chordates (Mirabeau and Joly 2013) and likewise our more specific  
796 analysis of the phylogenetic distribution and relationships NPY/NPF-type and sNPF-type  
797 receptors (Figure 3) also did not reveal the presence of orthologs of protostome sNPF-type  
798 receptors in hemichordates and chordates. Based on these findings and our discovery of  
799 sNPF-type signalling in echinoderms it could be inferred that sNPF-type signalling has been  
800 lost in hemichordates and chordates. However, a cluster analysis of bilaterian neuropeptide  
801 receptor relationships has revealed that protostome sNPF-type receptors cluster with  
802 receptors for vertebrate prolactin-releasing peptides (PrRPs) (Jekely, 2013). This contrasts  
803 with our (Figure 3) and previous (Mirabeau and Joly 2013) analysis of neuropeptide receptor  
804 relationships by generation of phylogenetic trees, which revealed that chordate and  
805 hemichordate PrRP-type receptors do not clade with sNPF-type receptors. A limitation of  
806 cluster analysis of receptor relationships is that it is based on pairwise comparisons that  
807 cannot resolve paralogy/orthology relationships because speciation/duplication nodes are  
808 not retrieved (Gabaldón 2008; Kim et al. 2008). Thus, the determination of deep homology  
809 relationships is normally accomplished by generating phylogenetic trees (Gabaldón 2008).  
810 Nevertheless, informed by the hypothesis of Jekely (2013) that sNPF-type signalling may  
811 be orthologous to PrRP-type signalling, which was also reported in a recent review article  
812 (Fadda et al., 2019), here we investigated the occurrence PrRP-like neuropeptides in the  
813 hemichordate *S. kowalevskii* and the cephalochordate *B. floridae*. Importantly, we identified  
814 one precursor protein in *B. floridae* and two precursor proteins in *S. kowalevskii* that contain  
815 peptides that share sequence similarity with both echinoderm sNPF-type neuropeptides and  
816 with vertebrate PrRP-type neuropeptides. Thus, as shown in the alignment in Figure 7A, in  
817 addition to a conserved RF/RN-amide C-terminal group there are thirteen other residues in  
818 the chordate PrRP-type neuropeptides that are conserved in at least one of the echinoderm  
819 sNPF-type neuropeptides or *S. kowalevskii* PrRP-like neuropeptides. Furthermore, genes  
820 encoding echinoderm sNPFs, hemichordate PrRP-like neuropeptides and chordate PrRPs  
821 have the common characteristic of an intron that interrupts the coding sequence at a position  
822 corresponding to their N-terminal or central regions. Furthermore, the intron consistently



823 interrupts the coding sequence in the same frame, at a position between the first and second  
 824 nucleotide of the interrupted codon, as denoted by +1 in Figure 7B. This contrasts with  
 825 NPY/NPF-type genes that have a highly conserved intron interrupting the coding sequence at  
 826 a position corresponding to the C-terminal region of the mature peptides, with the intron  
 827 located between the second and third nucleotide of the codon for a conserved arginine  
 828 residue, as denoted by -1 in Figure 2. Collectively, these findings are supportive of the  
 829 hypothesis that echinoderm sNPF-type neuropeptides are orthologs of vertebrate PrRP-type  
 830 neuropeptides and the novel PrRP-like peptides that we have identified here in the  
 831 hemichordate *S. kowalevskii* and the cephalochordate *B. floridae*. Furthermore, it is  
 832 noteworthy that orthologs of vertebrate PrRP-type receptors have been identified in  
 833 cephalochordates and hemichordates (Mirabeau and Joly 2013) (see also Figure 3). Thus,  
 834 there are mutually exclusive patterns in the phylogenetic distribution of sNPF-type receptors  
 835 and PrRP-type receptors, with the former found only in protostomes and echinoderms and the  
 836 latter found only in vertebrates, cephalochordates and hemichordates (Figure 8). A  
 837 parsimonious interpretation of this finding is that sNPF-type signalling is orthologous to  
 838 vertebrate PrRP-type signalling. However, it is possible that duplication of an sNPF/PrRP-  
 839 type signalling system occurred in a common ancestor of the deuterostomes, with paralogous  
 840 signalling systems then being differentially retained in different lineages; i.e. retention of  
 841 sNPF-type signalling and loss of PrRP-type signalling occurring in echinoderms and *vice*  
 842 *versa* in hemichordates and chordates.  
 843

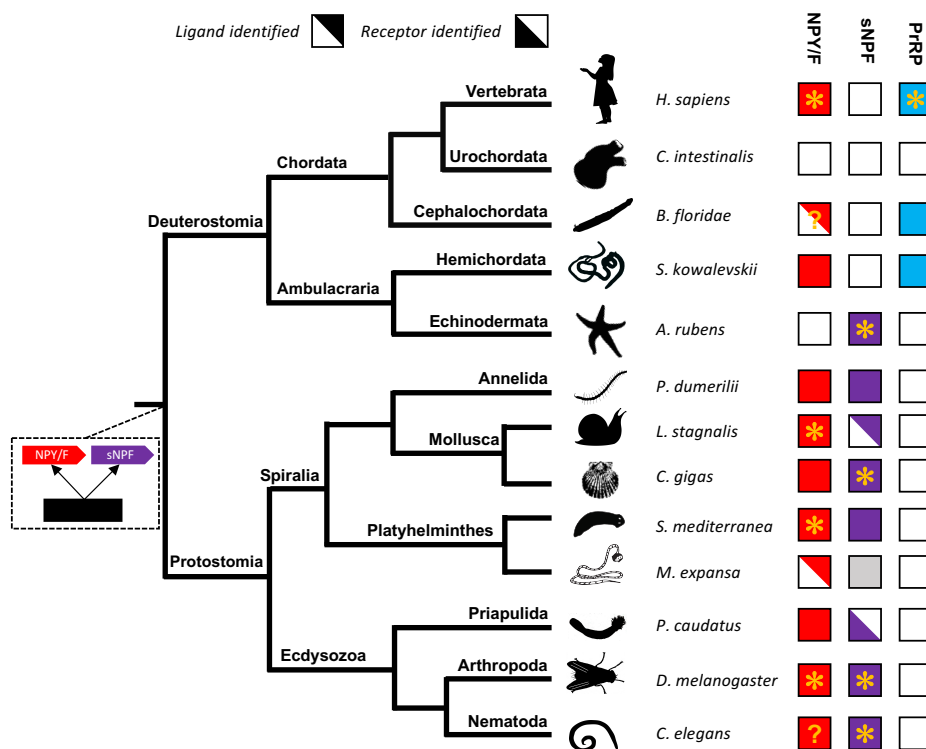

844  
 845 **Figure 8. Phylogenetic diagram showing the occurrence of NPY/NPF-type, sNPF-type and PrRP-**  
 846 **type neuropeptide signalling in the Bilateria.** The phylogenetic tree shows relationships of selected  
 847 bilaterian phyla. Phyla in which NPY/NPF-type peptides/precursors and NPY/NPF receptors have been  
 848 identified are labelled with red-filled squares. Phyla in which sNPF-type peptides/precursors and sNPF-  
 849 type receptors have been identified are labelled with purple-filled squares. Phyla in which PrRP-type

850 peptides/precursors and PrRP-type receptors have been identified are labelled with blue-filled squares. The  
851 inclusion of an asterisk in filled squares indicates that activation of a receptor by a peptide ligand has been  
852 demonstrated experimentally. Note that the starfish *Asterias rubens* is the first and only deuterostome in  
853 which the neuropeptide ligand for an sNPF-type receptor has been identified. Note also the mutually  
854 exclusive patterns in the phylogenetic distribution of sNPF-type signalling and PrRP-type signalling, with  
855 the former found only in protostomes and echinoderms and the latter found only in vertebrates,  
856 cephalochordates and hemichordates, which is supportive of the hypothesis that these signalling systems  
857 may be orthologous. NPY/NPF-type signalling occurs in most phyla, but it has been lost in echinoderms  
858 and urochordates. However, the inclusion of a question mark for the putative NPY/NPF-type peptide  
859 identified in the cephalochordate *B. floridae* (Mirabeau and Joly 2013; Elphick and Mirabeau 2014)  
860 signifies that it is atypical of NPY/NPF-type peptides, which may explain why NPY/NPF-type receptors  
861 have yet to be identified in cephalochordates. The inclusion of a question mark in the *C. elegans* red square  
862 indicates that the peptide identified as a ligand for the *C. elegans* NPY/NPF-type receptor (Chalasani et al.  
863 2010) does not have the typical features of an NPY/NPF-type peptide. The grey square for sNPF in *M.*  
864 *expansa*, for which only transcriptome sequence data are available, indicates that sNPF-type peptides and  
865 sNPF-type receptor(s) are likely to be present in this species because sNPF-type peptides and sNPF-type  
866 receptors have been identified in another platyhelminth species, *S. mediterranea*, for which a genome  
867 sequence is available. Species names are as follows: *H. sapiens* (*Homo sapiens*), *C. intestinalis* (*Ciona*  
868 *intestinalis*), *B. floridae* (*Branchiostoma floridae*), *S. kowalevskii* (*Saccoglossus kowalevskii*), *A. rubens*  
869 (*Asterias rubens*), *P. dumerilii* (*Platynereis dumerilii*), *L. stagnalis* (*Lymnaea stagnalis*), *M. expansa*  
870 (*Moniezia expansa*), *S. mediterranea* (*Schmidtea mediterranea*), *C. gigas* (*Crassostrea gigas*), *D.*  
871 *melanogaster* (*Drosophila melanogaster*), *C. elegans* (*Caenorhabditis elegans*). Silhouettes of  
872 representative animals from each phylum are from [www.openclipart.com](http://www.openclipart.com) and they are free from copyright.

873

874

## 875 **General conclusions**

876 The findings reported in this paper provide important new insights into the evolution  
877 of NPY/NPF-type and sNPF-type neuropeptide signalling systems. Discovery of a sNPF-type  
878 signalling system in an echinoderm has provided the first experimental evidence that the  
879 evolutionary origin of sNPF-type signalling can be traced back to the common ancestor of the  
880 Bilateria. Furthermore, discovery of sNPF-type neuropeptides in echinoderms has provided  
881 evidence that sNPF-type neuropeptides are orthologs of vertebrate prolactin-releasing  
882 peptides. Thus, this study powerfully illustrates the importance of research on neuropeptide  
883 signalling systems in echinoderms (and other deuterostome invertebrates) in providing key  
884 missing links for reconstruction of neuropeptide evolution.

885 **Material and methods**

886

887 **Animals**

888 Starfish (*Asterias rubens*) were obtained from a fisherman based at Whitstable  
889 (Kent, UK). They were then maintained in a circulating seawater aquarium at ~11 °C in  
890 the School of Biological and Chemical Sciences at Queen Mary University of London and  
891 were fed on mussels (*Mytilus edulis*) collected near Margate (Kent, UK).

892

893 **Cloning and sequencing of a cDNA encoding the precursor of an *A. rubens* NPY-like**  
894 **peptide**

895 A transcript encoding the *A. rubens* precursor of an NPY-like peptide (ArNPYLP)  
896 has been identified previously (GenBank: MK033631) (Zandawala et al. 2017). The cDNA  
897 containing the complete open reading frame of the ArNPYLP precursor was amplified by  
898 PCR using *A. rubens* radial nerve cord cDNA, the forward primer  
899 AAGTCAAAAGGCGAGCAAGA, the reverse primer AAAGGGATGTGGTGTGGTG  
900 and Q5 polymerase (NEB; Cat. No. M0491S). The PCR products were ligated into the  
901 pBluescript II KS (+) vector (Invitrogen; Cat. No. K280002) that had been cut previously  
902 with the restriction enzyme *EcoRV* by performing blunt-end ligation with T4 DNA ligase  
903 (NEB; Cat. No. M0202S). The cloning was confirmed by restriction enzyme digestion and  
904 sequencing (TubeSeq service; Eurofins Genomics).

905

906 **Structural characterisation of the *A. rubens* NPY-like peptide using mass spectrometry.**

907 After confirming the nucleotide sequence of the ArNPYLP precursor by cloning and  
908 sequencing, mass spectrometry was used to determine the structure of the peptide derived  
909 from this precursor. The methods employed, including extraction of peptides from *A. rubens*  
910 radial nerve cords, treatment of samples, equilibration of columns, reverse phase  
911 chromatography for the initial separation and injection into a Orbitrap-Fusion  
912 (ThermoScientific) for tandem mass spectrometry (MS/MS), were performed using a  
913 previously reported protocol for the identification of the starfish neuropeptides (Lin et al.  
914 2017). The methods employed for data analysis are described below. Mass spectra were  
915 searched using Sequest Proteome Discoverer (Thermo Fisher Scientific, v. 2.2) against a  
916 database comprising forty-three different precursor proteins identified by analysis of *A.*  
917 *rubens* neural transcriptome data, including the *A. rubens* ArNPYLP precursor and all  
918 proteins in GenBank from species belonging to the Asteroidea family and the common  
919 Repository of Adventitious Proteins Database (<http://www.thegpm.org/cRAP/index.html>).  
920 Theoretical peptides were generated allowing up to two missed cleavages and variable  
921 modifications, including amidation (-0.98402) of C-terminal glycines and pyroglutamate (-  
922 17.02655) of N-terminal glutamines, and oxidation of methionine (+15.99). Precursor mass  
923 tolerance was 10 ppm and fragment ions were searched at 0.8 Da tolerances. Results from  
924 Discoverer were collated and annotated in Scaffold version 4.8.4 (Proteome Software).

925

926 **Sequence alignment of the *A. rubens* NPY-like peptide with NPY-like peptides from**  
927 **other echinoderms and NPY/NPF-type peptides from other taxa.**

928 The amino acid sequence of ArNPYLP, as confirmed by mass spectrometry, and  
929 predicted orthologs from other echinoderm species were aligned with the sequences of  
930 NPY/NPF-type peptides from a variety of bilaterian species (see Supplementary table 1 for a  
931 list of the sequences) using MAFFT, with the number of maximum iterations set to 1000 to  
932 ensure an optimal alignment. These alignments were highlighted using the software  
933 BOXSHADE ([www.ch.embnet.org/software/BOX\\_form.html](http://www.ch.embnet.org/software/BOX_form.html)) with 70% conservation as the  
934 minimum. Finally, the sequences were highlighted in phylum-specific or superphylum-  
935 specific colours: dark blue (Echinodermata), light blue (Hemichordata), purple (Chordata),  
936 orange (Platyhelminthes), red (Lophotrochozoa), yellow (Priapulida), green (Arthropoda),  
937 grey (Nematoda).

938

### 939 **Comparison of the exon/intron structure of genes encoding NPY-like peptides in** 940 **echinoderms and genes encoding NPY/NPF-type peptides in other taxa.**

941 The sequences of transcripts and genes encoding precursors of echinoderm NPY-like  
942 peptides and NPY/NPF-type precursors from other taxa were obtained using BLAST  
943 (<https://blast.ncbi.nlm.nih.gov/>). See supplementary table 2 for a list of the transcript and  
944 gene sequences used. The online tool Splign (Kapustin et al. 2008)  
945 (<https://www.ncbi.nlm.nih.gov/sutils/splign/splign.cgi>) was employed to determine and  
946 analyse gene structure and schematic figures showing the gene structure were generated  
947 using IBS 1.0 (Liu et al. 2015).

948

### 949 **Identification and phylogenetic characterisation of an *A. rubens* G-protein coupled** 950 **receptor related to NPY/NPF/sNPF-type receptors**

951 To identify a candidate receptor for the *A. rubens* NPY-like peptide ArNPYLP, *A.*  
952 *rubens* neural transcriptome sequence data was analysed using sequenceserver BLAST  
953 (Priyam et al. 2015), submitting NPY-type receptors from *H. sapiens* (GenBank  
954 NP\_000900.1, NP\_000901.1, NP\_001265724.1) an NPF-type receptor from *D.*  
955 *melanogaster* (GenBank AAF51909.3) and sNPF-type receptors from *D. melanogaster*  
956 (GenBank; NP\_524176.1) and *C. gigas* (GenBank XP\_011451552.1) as query sequences.  
957 A transcript (contig 1120879) encoding a 386-residue protein  
958 (<http://web.expasy.org/translate/>) was identified as the top hit in all BLAST searches and  
959 this was deposited in GenBank under the accession number MH807444. The protein  
960 sequence was also analysed using Protter V1.0 (Omasits et al. 2014). Using BLAST,  
961 homologs of the *A. rubens* protein were identified in other echinoderms, including the  
962 starfish *Acanthaster planci* (XP\_022101544.1), the sea urchin *Strongylocentrotus*  
963 *purpuratus* (XP\_003725178.1) and the sea cucumber *Apostichopus japonicus*  
964 (PIK36230.1).

965 To investigate the relationship of the echinoderm receptors with NPY/NPF-type  
966 receptors and sNPF-type receptors from other taxa, a phylogenetic tree was generated  
967 using the maximum-likelihood method (see supplementary table 3 for a list of sequences  
968 used). Receptor sequences were aligned using the MUSCLE plugin in MEGA 7 (iterative, 10  
969 iterations, UPGMB as clustering method) (Edgar 2004; Kumar et al. 2016) and the alignment  
970 was manually trimmed in the C-terminal and N-terminal regions to include a total of 300  
971 residues spanning from the first to the seventh transmembrane domains. The maximum-

972 likelihood tree was generated using W-IQ-tree online version 1.0 (1000 bootstrap replicates,  
973 LG+G+I+F substitution model) (Trifinopoulos et al. 2016).

974

### 975 **Cloning and pharmacological characterisation of the *A. rubens* NPY/NPF/sNPF-type** 976 **receptor**

977 To enable the pharmacological characterisation of the *A. rubens* NPY/NPF/sNPF-  
978 type receptor, a cDNA encoding this receptor was cloned into the eukaryotic expression  
979 vector pcDNA 3.1(+) (Invitrogen; Cat. No. V790-20). To facilitate expression of the  
980 cloned receptor, the forward primer included a partial Kozak consensus sequence (ACC)  
981 and a sequence corresponding to the first 15 bases of the open reading frame of contig  
982 1120879 (ACCATGCAGATGACAACC) and the reverse primer consisted of a stop codon  
983 and a sequence reverse complementary to the 3' region of the open reading frame of contig  
984 1120879 (GCGTCACATAGTGGTATCATG). PCR was performed using the forward  
985 primer and reverse primers, *A. rubens* radial nerve cord cDNA and Q5 polymerase (NEB;  
986 Cat. No. M0491S). PCR products were ligated into the pcDNA 3.1(+) vector that had been  
987 cut previously with the restriction enzyme *EcoRV* by performing blunt-end ligation with T4  
988 DNA ligase (NEB; Cat. No. M0202S). Successful ligation and the direction of the insert was  
989 determined by restriction enzyme digestion and sequencing (TubeSeq service; Eurofins  
990 Genomics).

991 Chinese hamster ovary (CHO)-K1 cells stably expressing the calcium sensitive  
992 aequorin fusion protein (G5A) and transfected with the human promiscuous G-protein Gα16  
993 (Baubet et al. 2000) were used as an expression system to functionally characterise the *A.*  
994 *rubens* NPY/NPF/sNPF-type receptor. Cells were cultured, transfected and luminescence  
995 assays were performed as described previously (Yañez-Guerra et al. 2018). After transfection  
996 with the *A. rubens* sNPF-type receptor, cells were exposed to the *A. rubens* NPY-like  
997 peptide pQDRSKAMQAERTGQLRRLNPRF-NH<sub>2</sub> (custom synthesised by Peptide Protein  
998 Research Ltd., Fareham, UK), which was diluted in DMEM/F12 Nutrient Mixture medium at  
999 concentrations ranging from 10<sup>-14</sup> M to 10<sup>-5</sup> M in clear bottom 96-well plates (Sigma-  
1000 Aldrich; Cat. No. CLS3603-48EA). Luminescence was measured over a 30 second period  
1001 using a FLUOstar Omega Plate Reader (BMG LABTECH; FLUOstar Omega Series multi-  
1002 mode microplate reader) and data were integrated over the 30-second measurement period.  
1003 For each concentration, measurements were performed in triplicate, and the average of each  
1004 was used to normalise the responses. The responses were normalised to the maximum  
1005 luminescence measured in each experiment (100% activation) and to the background  
1006 luminescence with the vehicle media (0% activation). Dose-response curves were fitted with  
1007 a four-parameter curve and EC<sub>50</sub> values were calculated using Prism 6 (GraphPad, La Jolla,  
1008 USA), from dose–response curves based on at least three independent transfections.

1009

### 1010 **Sequence alignment of the *A. rubens* sNPF and related peptides from other echinoderms** 1011 **with sNPF-type peptides from other taxa.**

1012 The sequences of echinoderm sNPF-type peptides were aligned with sNPF-type  
1013 peptides that have been identified in protostomes (see supplementary table 4 for a list of the  
1014 sequences used) using MAFFT version 7 (5 iterations, substitution matrix; BLOSUM62) and  
1015 then manually curated. Highlighting of the conserved residues was done using BOXSHADE

1016 (www.ch.embnet.org/software/BOX\_form.html) with 70% conservation as the minimum for  
1017 highlighting.

1018

1019 **Comparison of the exon/intron structure of genes encoding sNPF peptides in**  
1020 **echinoderms and genes encoding sNPF-type peptides in other taxa.**

1021 The sequences of transcripts and genes encoding echinoderm sNPF-type precursors  
1022 and sNPF/sNPFL/FLP-3/FLP-15/FLP-18/FLP-21 precursors from protostomes were obtained  
1023 using BLAST (<https://blast.ncbi.nlm.nih.gov/>) (see supplementary table 5 for a list of the  
1024 transcript and gene sequences analysed). The online tool Splign (Kapustin et al. 2008)  
1025 (<https://www.ncbi.nlm.nih.gov/sutils/splign/splign.cgi>) was employed to determine the  
1026 structure of genes encoding these peptide precursors. Schematic figures showing the gene  
1027 structure were generated using IBS 1.0 (Liu et al. 2015).

1028

1029 **Sequence alignment of *A. rubens* sNPF and related peptides from other echinoderms**  
1030 **with PrRP-type peptides from chordates and PrRP-like peptides from the hemichordate**  
1031 ***S. kowalevskii*.**

1032 To identify candidate ligands for PrRP-type receptors in the cephalochordate *B.*  
1033 *floridae* and the hemichordate *S. kowalevskii* (Figure 3), we analysed transcriptomic and  
1034 genomic sequence data for these species (Putnam et al. 2008; Simakov et al. 2015). The data  
1035 analysed also included a list of predicted *S. kowalevskii* proteins kindly provided to O.  
1036 Mirabeau by Dr. R.M. Freeman (Harvard Medical School, USA). The methods employed to  
1037 identify candidate neuropeptide precursors have been reported previously (Mirabeau and Joly  
1038 2013) but here we had the more specific objective of identifying proteins with an N-terminal  
1039 signal peptide followed by a neuropeptide with a predicted C-terminal RFamide or RYamide  
1040 motif. This resulted in discovery of one candidate PrRP-type precursor in the  
1041 cephalochordate *B. floridae* and two candidate PrRP-type precursors in the hemichordate *S.*  
1042 *kowalevskii*.

1043 The sequences of echinoderm sNPF-type peptides were aligned with chordate PrRP-  
1044 type peptides and the two PrRP-like peptides from *S. kowalevskii* (see supplementary table 6  
1045 for a list of the sequences used) using MAFFT version 7 (5 iterations, substitution matrix;  
1046 BLOSUM62) and then manually curated. Highlighting of the conserved residues was done  
1047 using BOXSHADE (www.ch.embnet.org/software/BOX\_form.html) with 70% conservation  
1048 as the minimum for highlighting.

1049

1050 **Comparison of the exon/intron structure of genes encoding sNPF precursors in**  
1051 **echinoderms with genes encoding precursors of PrRP-type peptides in chordates and**  
1052 **genes encoding precursors of PrRP-like peptides in the hemichordate *S. kowalevskii*.**

1053 The sequences of transcripts and genes encoding echinoderm sNPF precursors,  
1054 chordate PrRP-type precursors and one of the *S. kowalevskii* precursors (Skow1) of a PrRP-  
1055 like peptide were obtained using BLAST (<https://blast.ncbi.nlm.nih.gov/>). The sequence of a  
1056 predicted transcript encoding a second *S. kowalevskii* precursor (Skow2) of a PrRP-like  
1057 peptide was determined based on a GenScan prediction (Burge and Karlin 1997; Burge and  
1058 Karlin 1998) from scaffold 51909 (GenBank accession number NW\_003156735.1). See  
1059 supplementary table 6 for a list of the transcript and gene sequences analysed. The online tool



1060 Splign (Kapustin et al. 2008) (<https://www.ncbi.nlm.nih.gov/sutils/splign/splign.cgi>) was  
1061 employed to determine the exon/intron structure of genes and schematic figures showing  
1062 gene structure were generated using IBS 1.0 (Liu et al. 2015).

1063 **Acknowledgments**

1064

1065 The work reported in this paper was supported by grants from the BBSRC awarded to M.R.E  
1066 (BB/M001644/1) and A.M.J. (BB/M001032/1). L.A.Y.G was supported by a PhD  
1067 studentship awarded by the Mexican Council of Science and Technology (CONACyT  
1068 studentship no. 418612) and Queen Mary University of London and by a Leverhulme Trust  
1069 grant (RPG-2016-353) awarded to M.R.E. X.Z. was supported by a PhD studentship awarded  
1070 by the China Scholarship Council and Queen Mary University of London.

1071

1072 **Competing interests**

1073

1074 The authors declare that they have no conflict of interest

1075

1076 **Bibliography**

1077

1078 Adrian TE, Allen JM, Bloom SR, Ghatei MA, Rossor MN, Roberts GW, Crow TJ, Tatemoto  
1079 K, Polak JM. 1983. Neuropeptide Y distribution in human brain. *Nature* 306:584–  
1080 586.

1081 Ament SA, Velarde RA, Kolodkin MH, Moyse D, Robinson GE. 2011. Neuropeptide Y-like  
1082 signalling and nutritionally mediated gene expression and behaviour in the honey bee.  
1083 *Insect Mol Biol* 20:335–345.

1084 Bard JA, Walker MW, Branchek TA, Weinshank RL. 1995. Cloning and functional  
1085 expression of a human Y4 subtype receptor for pancreatic polypeptide, neuropeptide  
1086 Y, and peptide YY. *J Biol Chem* 270:26762–26765.

1087 Baubet V, Le Mouellic H, Campbell AK, Lucas-Meunier E, Fossier P, Brûlet P. 2000.  
1088 Chimeric green fluorescent protein-aequorin as bioluminescent Ca<sup>2+</sup> reporters at the  
1089 single-cell level. *Proc Natl Acad Sci U S A* 97:7260–7265.

1090 Bauknecht P, Jékely G. 2015. Large-Scale Combinatorial Deorphanization of Platynereis  
1091 Neuropeptide GPCRs. *Cell Rep* 12:684–693.

1092 Bigot L, Beets I, Dubos M-P, Boudry P, Schoofs L, Favrel P. 2014. Functional  
1093 characterization of a short neuropeptide F-related receptor in a lophotrochozoan, the  
1094 mollusk *Crassostrea gigas*. *J Exp Biol* 217:2974–2982.

1095 Blomqvist AG, Söderberg C, Lundell I, Milner RJ, Larhammar D. 1992. Strong evolutionary  
1096 conservation of neuropeptide Y: sequences of chicken, goldfish, and *Torpedo*  
1097 *marmorata* DNA clones. *Proc Natl Acad Sci U S A* 89:2350–2354.

1098 Blundell TL, Pitts JE, Tickle IJ, Wood SP, Wu CW. 1981. X-ray analysis (1.4-Å resolution)  
1099 of avian pancreatic polypeptide: Small globular protein hormone. *Proc Natl Acad Sci*  
1100 *U S A* 78:4175–4179.

1101 Brockmann A, Annangudi SP, Richmond TA, Ament SA, Xie F, Southey BR, Rodriguez-Zas  
1102 SR, Robinson GE, Sweedler JV. 2009. Quantitative peptidomics reveal brain peptide  
1103 signatures of behavior. *Proc Natl Acad Sci U S A* 106:2383–2388.

1104 Brown MR, Crim JW, Arata RC, Cai HN, Chun C, Shen P. 1999. Identification of a  
1105 *Drosophila* brain-gut peptide related to the neuropeptide Y family. *Peptides* 20:1035–  
1106 1042.

1107 Burge CB, Karlin S. 1998. Finding the genes in genomic DNA. *Curr Opin Struct Biol* 8:346–  
1108 354.

1109 Burge C, Karlin S. 1997. Prediction of complete gene structures in human genomic DNA. *J*  
1110 *Mol Biol* 268:78–94.

1111 Cardoso JCR, Félix RC, Fonseca VG, Power DM. 2012. Feeding and the rhodopsin family g-  
1112 protein coupled receptors in nematodes and arthropods. *Front Endocrinol (Lausanne)*  
1113 3:157.

1114 Cerdá-Reverter JM, Martínez-Rodríguez G, Zanuy S, Carrillo M, Larhammar D. 2000.  
1115 Molecular evolution of the neuropeptide Y (NPY) family of peptides: cloning of three  
1116 NPY-related peptides from the sea bass (*Dicentrarchus labrax*). *Regul Pept* 95:25–34.

1117 Chalasani SH, Kato S, Albrecht DR, Nakagawa T, Abbott LF, Bargmann CI. 2010.  
1118 Neuropeptide feedback modifies odor-evoked dynamics in *Caenorhabditis elegans*  
1119 olfactory neurons. *Nat Neurosci* 13:615–621.

1120 Chen M-E, Pietrantonio PV. 2006. The short neuropeptide F-like receptor from the red  
1121 imported fire ant, *Solenopsis invicta* Buren (Hymenoptera: Formicidae). *Arch Insect*  
1122 *Biochem Physiol* 61:195–208.

1123 Christ P, Hill SR, Schachtner J, Hauser F, Ignell R. 2018. Functional characterization of  
1124 mosquito short neuropeptide F receptors. *Peptides* 103:31–39.

1125 Cohen M, Reale V, Olofsson B, Knights A, Evans P, de Bono M. 2009. Coordinated

- 1126 regulation of foraging and metabolism in *C. elegans* by RFamide neuropeptide  
1127 signaling. *Cell Metab* 9:375–385.
- 1128 Conzelmann M, Williams EA, Krug K, Franz-Wachtel M, Macek B, Jékely G. 2013. The  
1129 neuropeptide complement of the marine annelid *Platynereis dumerilii*. *BMC*  
1130 *Genomics* 14:906.
- 1131 Curry WJ, Shaw C, Johnston CF, Thim L, Buchanan KD. 1992. Neuropeptide F: primary  
1132 structure from the tubellarian, *Artioposthia triangulata*. *Comp Biochem Physiol C,*  
1133 *Comp Pharmacol Toxicol* 101:269–274.
- 1134 Díaz-Miranda L, Escalona de Motta G, García-Arrarás JE. 1991. Localization of  
1135 neuropeptides in the nervous system of the marine annelid *Sabellastarte magnifica*.  
1136 *Cell Tissue Res* 266:209–217.
- 1137 Dillen S, Verdonck R, Zels S, Van Wielendaele P, Broeck JV. 2013. Identification of the  
1138 short Neuropeptide F precursor in the desert locust: Evidence for an inhibitory role of  
1139 sNPF in the control of feeding. *Peptides*.
- 1140 Dillen S, Zels S, Verlinden H, Spit J, Van Wielendaele P, Vanden Broeck J. 2013. Functional  
1141 characterization of the short neuropeptide F receptor in the desert locust, *Schistocerca*  
1142 *gregaria*. *PLoS ONE* 8:e53604.
- 1143 Edgar RC. 2004. MUSCLE: multiple sequence alignment with high accuracy and high  
1144 throughput. *Nucleic Acids Res* 32:1792–1797.
- 1145 Elphick MR, Mirabeau O. 2014. The Evolution and Variety of RFamide-Type  
1146 Neuropeptides: Insights from Deuterostomian Invertebrates. *Front Endocrinol*  
1147 (Lausanne) 5:93.
- 1148 Elphick MR, Mirabeau O, Larhammar D. 2018. Evolution of neuropeptide signalling  
1149 systems. *J Exp Biol* 221.
- 1150 Ezcurrea M, Walker DS, Beets I, Swoboda P, Schafer WR. 2016. Neuropeptidergic Signaling  
1151 and Active Feeding State Inhibit Nociception in *Caenorhabditis elegans*. *J Neurosci*  
1152 36:3157–3169.
- 1153 Fadda M, Hasakiogullari I, Temmerman L, Beets I, Zels S, Schoofs L. 2019. Regulation of  
1154 feeding and metabolism by neuropeptide F and short neuropeptide F in invertebrates.  
1155 *Front Endocrinol (Lausanne)* 10:64.
- 1156 Farzi A, Reichmann F, Holzer P. 2015. The homeostatic role of neuropeptide Y in immune  
1157 function and its impact on mood and behaviour. *Acta Physiol (Oxf)* 213:603–627.
- 1158 Gabaldón T. 2008. Large-scale assignment of orthology: back to phylogenetics? *Genome*  
1159 *Biol* 9:235.
- 1160 Garczynski SF, Brown MR, Shen P, Murray TF, Crim JW. 2002. Characterization of a  
1161 functional neuropeptide F receptor from *Drosophila melanogaster*. *Peptides* 23:773–  
1162 780.
- 1163 Garczynski SF, Crim JW, Brown MR. 2007. Characterization and expression of the short  
1164 neuropeptide F receptor in the African malaria mosquito, *Anopheles gambiae*.  
1165 *Peptides* 28:109–118.
- 1166 Glover ID, Barlow DJ, Pitts JE, Wood SP, Tickle IJ, Blundell TL, Tatemoto K, Kimmel JR,  
1167 Wollmer A, Strassburger W. 1984. Conformational studies on the pancreatic  
1168 polypeptide hormone family. *Eur J Biochem* 142:379–385.
- 1169 Glover I, Haneef I, Pitts J, Wood S, Moss D, Tickle I, Blundell T. 1983. Conformational  
1170 flexibility in a small globular hormone: x-ray analysis of avian pancreatic polypeptide  
1171 at 0.98-Å resolution. *Biopolymers* 22:293–304.
- 1172 Hinuma S, Habata Y, Fujii R, Kawamata Y, Hosoya M, Fukusumi S, Kitada C, Masuo Y,  
1173 Asano T, Matsumoto H, et al. 1998. A prolactin-releasing peptide in the brain. *Nature*  
1174 393:272–276.
- 1175 Hoek RM, Li KW, van Minnen J, Lodder JC, de Jong-Brink M, Smit AB, van Kesteren RE.

1176 2005. LFRFamides: a novel family of parasitism-induced -RFamide neuropeptides  
1177 that inhibit the activity of neuroendocrine cells in *Lymnaea stagnalis*. *J Neurochem*  
1178 92:1073–1080.

1179 Holzer P, Reichmann F, Farzi A. 2012. Neuropeptide Y, peptide YY and pancreatic  
1180 polypeptide in the gut-brain axis. *Neuropeptides* 46:261–274.

1181 Jékely G. 2013. Global view of the evolution and diversity of metazoan neuropeptide  
1182 signaling. *Proc Natl Acad Sci U S A* 110:8702–8707.

1183 Jékely G, Melzer S, Beets I, Kadow ICG, Koene J, Haddad S, Holden-Dye L. 2018. The long  
1184 and the short of it - a perspective on peptidergic regulation of circuits and behaviour. *J*  
1185 *Exp Biol* 221.

1186 Jiang H-B, Gui S-H, Xu L, Pei Y-X, Smagghe G, Wang J-J. 2017. The short neuropeptide F  
1187 modulates olfactory sensitivity of *Bactrocera dorsalis* upon starvation. *J Insect Physiol*  
1188 99:78–85.

1189 Kapustin Y, Souvorov A, Tatusova T, Lipman D. 2008. Splign: algorithms for computing  
1190 spliced alignments with identification of paralogs. *Biol Direct* 3:20.

1191 Kawada T, Sekiguchi T, Sakai T, Aoyama M, Satake H. 2010. Neuropeptides, hormone  
1192 peptides, and their receptors in *Ciona intestinalis*: an update. *Zool Sci* 27:134–153.

1193 Keire DA, Mannon P, Kobayashi M, Walsh JH, Solomon TE, Reeve JR. 2000. Primary  
1194 structures of PYY, [Pro(34)]PYY, and PYY-(3-36) confer different conformations  
1195 and receptor selectivity. *Am J Physiol Gastrointest Liver Physiol* 279:G126–G131.

1196 Kim KM, Sung S, Caetano-Anollés G, Han JY, Kim H. 2008. An approach of orthology  
1197 detection from homologous sequences under minimum evolution. *Nucleic Acids Res*  
1198 36:e110.

1199 Kubiak TM, Larsen MJ, Bowman JW, Geary TG, Lowery DE. 2008. FMRFamide-like  
1200 peptides encoded on the *flp-18* precursor gene activate two isoforms of the orphan  
1201 *Caenorhabditis elegans* G-protein-coupled receptor Y58G8A.4 heterologously  
1202 expressed in mammalian cells. *Biopolymers* 90:339–348.

1203 Kubiak TM, Larsen MJ, Nulf SC, Zantello MR, Burton KJ, Bowman JW, Modric T, Lowery  
1204 DE. 2003. Differential activation of “social” and “solitary” variants of the  
1205 *Caenorhabditis elegans* G protein-coupled receptor NPR-1 by its cognate ligand AF9.  
1206 *J Biol Chem* 278:33724–33729.

1207 Kubiak TM, Larsen MJ, Zantello MR, Bowman JW, Nulf SC, Lowery DE. 2003. Functional  
1208 annotation of the putative orphan *Caenorhabditis elegans* G-protein-coupled receptor  
1209 C10C6.2 as a FLP15 peptide receptor. *J Biol Chem* 278:42115–42120.

1210 Kumar S, Stecher G, Tamura K. 2016. MEGA7: molecular evolutionary genetics analysis  
1211 version 7.0 for bigger datasets. *Mol Biol Evol* 33:1870–1874.

1212 Lagerström MC, Fredriksson R, Bjarnadóttir TK, Fridmanis D, Holmquist T, Andersson J,  
1213 Yan Y-L, Raudsepp T, Zoorob R, Kukkonen JP, et al. 2005. Origin of the prolactin-  
1214 releasing hormone (PRLH) receptors: evidence of coevolution between PRLH and a  
1215 redundant neuropeptide Y receptor during vertebrate evolution. *Genomics* 85:688–  
1216 703.

1217 Larhammar D. 1996. Evolution of neuropeptide Y, peptide YY and pancreatic polypeptide.  
1218 *Regul Pept* 62:1–11.

1219 Larhammar D, Blomqvist AG, Söderberg C. 1993. Evolution of neuropeptide Y and its  
1220 related peptides. *Comp Biochem Physiol C, Comp Pharmacol Toxicol* 106:743–752.

1221 Lee K-S, You K-H, Choo J-K, Han Y-M, Yu K. 2004. *Drosophila* short neuropeptide F  
1222 regulates food intake and body size. *J Biol Chem* 279:50781–50789.

1223 Leung PS, Shaw C, Maule AG, Thim L, Johnston CF, Irvine GB. 1992. The primary  
1224 structure of neuropeptide F (NPF) from the garden snail, *Helix aspersa*. *Regul Pept*  
1225 41:71–81.

- 1226 Lin M, Mita M, Egertová M, Zampronio CG, Jones AM, Elphick MR. 2017. Cellular  
1227 localization of relaxin-like gonad-stimulating peptide expression in *Asterias rubens*:  
1228 New insights into neurohormonal control of spawning in starfish. *J Comp Neurol*  
1229 525:1599–1617.
- 1230 Liu W, Xie Y, Ma J, Luo X, Nie P, Zuo Z, Lahrman U, Zhao Q, Zheng Y, Zhao Y, et al.  
1231 2015. IBS: an illustrator for the presentation and visualization of biological  
1232 sequences. *Bioinformatics* 31:3359–3361.
- 1233 Lundell I, Berglund MM, Starbäck P, Salaneck E, Gehlert DR, Larhammar D. 1997. Cloning  
1234 and characterization of a novel neuropeptide Y receptor subtype in the zebrafish.  
1235 *DNA Cell Biol* 16:1357–1363.
- 1236 Mair GR, Halton DW, Shaw C, Maule AG. 2000. The neuropeptide F (NPF) encoding gene  
1237 from the cestode, *Moniezia expansa*. *Parasitology* 120:71–77.
- 1238 Ma Q, Cao Z, Yu Y, Yan L, Zhang W, Shi Y, Zhou N, Huang H. 2017. Bombyx  
1239 neuropeptide G protein-coupled receptor A7 is the third cognate receptor for short  
1240 neuropeptide F from silkworm. *J Biol Chem* 292:20599–20612.
- 1241 Maule AG, Shaw C, Halton DW, Thim L, Johnston CF, Fairweather I, Buchanan KD. 1991.  
1242 Neuropeptide F: a novel parasitic flatworm regulatory peptide from *Moniezia expansa*  
1243 (Cestoda: Cyclophyllidea). *Parasitology* 102:309–316.
- 1244 Mertens I, Meeusen T, Huybrechts R, De Loof A, Schoofs L. 2002. Characterization of the  
1245 short neuropeptide F receptor from *Drosophila melanogaster*. *Biochem Biophys Res*  
1246 *Commun* 297:1140–1148.
- 1247 Minor RK, Chang JW, de Cabo R. 2009. Hungry for life: How the arcuate nucleus and  
1248 neuropeptide Y may play a critical role in mediating the benefits of calorie restriction.  
1249 *Mol Cell Endocrinol* 299:79–88.
- 1250 Mirabeau O, Joly J-S. 2013. Molecular evolution of peptidergic signaling systems in  
1251 bilaterians. *Proc Natl Acad Sci U S A* 110:E2028–E2037.
- 1252 Morris BJ. 1989. Neuronal localisation of neuropeptide Y gene expression in rat brain. *J*  
1253 *Comp Neurol* 290:358–368.
- 1254 Nässel DR, Wegener C. 2011. A comparative review of short and long neuropeptide F  
1255 signaling in invertebrates: Any similarities to vertebrate neuropeptide Y signaling?  
1256 *Peptides* 32:1335–1355.
- 1257 Nygaard R, Nielbo S, Schwartz TW, Poulsen FM. 2006. The PP-fold solution structure of  
1258 human polypeptide YY and human PYY3-36 as determined by NMR. *Biochemistry*  
1259 45:8350–8357.
- 1260 Omasits U, Ahrens CH, Müller S, Wollscheid B. 2014. Protter: interactive protein feature  
1261 visualization and integration with experimental proteomic data. *Bioinformatics*  
1262 30:884–886.
- 1263 Pedrazzini T, Pralong F, Grouzmann E. 2003. Neuropeptide Y: the universal soldier. *Cell*  
1264 *Mol Life Sci* 60:350–377.
- 1265 Priyam A, Woodcroft BJ, Rai V, Munagala A, Moghul I, Ter F, Gibbins MA, Moon H,  
1266 Leonard G, Rumpf W, et al. 2015. Sequenceserver: a modern graphical user interface  
1267 for custom BLAST databases. *BioRxiv*.
- 1268 Putnam NH, Butts T, Ferrier DEK, Furlong RF, Hellsten U, Kawashima T, Robinson-  
1269 Rechavi M, Shoguchi E, Terry A, Yu J-K, et al. 2008. The amphioxus genome and  
1270 the evolution of the chordate karyotype. *Nature* 453:1064–1071.
- 1271 Rajpara SM, Garcia PD, Roberts R, Eliassen JC, Owens DF, Maltby D, Myers RM, Mayeri  
1272 E. 1992. Identification and molecular cloning of a neuropeptide Y homolog that  
1273 produces prolonged inhibition in *Aplysia* neurons. *Neuron* 9:505–513.
- 1274 Roch GJ, Tello JA, Sherwood NM. 2014. At the transition from invertebrates to vertebrates, a  
1275 novel GnRH-like peptide emerges in amphioxus. *Mol Biol Evol* 31:765–778.



1276 Rogers C, Reale V, Kim K, Chatwin H, Li C, Evans P, de Bono M. 2003. Inhibition of  
1277 *Caenorhabditis elegans* social feeding by FMRFamide-related peptide activation of  
1278 NPR-1. *Nat Neurosci* 6:1178–1185.

1279 Saberi A, Jamal A, Beets I, Schoofs L, Newmark PA. 2016. Gpcrs direct germline  
1280 development and somatic gonad function in planarians. *PLoS Biol* 14:e1002457.

1281 Satoh N, Rokhsar D, Nishikawa T. 2014. Chordate evolution and the three-phylum system.  
1282 *Proc Biol Sci* 281:20141729.

1283 Schoofs L, Clynen E, Cerstiaens A, Baggerman G, Wei Z, Vercammen T, Nachman R, De  
1284 Loof A, Tanaka S. 2001. Newly discovered functions for some myotropic  
1285 neuropeptides in locusts. *Peptides* 22:219–227.

1286 Schwartz TW, Fuhlendorff J, Kjems LL, Kristensen MS, Vervelde M, O’Hare M,  
1287 Krstenansky JL, Bjørnholm B. 1990. Signal Epitopes in the Three-Dimensional  
1288 Structure of Neuropeptide Y. *Ann N Y Acad Sci* 611:35–47.

1289 Semmens DC, Beets I, Rowe ML, Blowes LM, Oliveri P, Elphick MR. 2015. Discovery of  
1290 sea urchin NGFFamide receptor unites a bilaterian neuropeptide family. *Open Biol*  
1291 5:150030.

1292 Semmens DC, Mirabeau O, Moghul I, Pancholi MR, Wurm Y, Elphick MR. 2016.  
1293 Transcriptomic identification of starfish neuropeptide precursors yields new insights  
1294 into neuropeptide evolution. *Open Biol* 6:150224.

1295 Simakov O, Kawashima T, Marlétaz F, Jenkins J, Koyanagi R, Mitros T, Hisata K, Bredeson  
1296 J, Shoguchi E, Gyoja F, et al. 2015. Hemichordate genomes and deuterostome origins.  
1297 *Nature* 527:459–465.

1298 Spittaels K, Verhaert P, Shaw C, Johnston RN, Devreese B, Van Beeumen J, De Loof A.  
1299 1996. Insect neuropeptide F (NPF)-related peptides: isolation from Colorado potato  
1300 beetle (*Leptinotarsa decemlineata*) brain. *Insect Biochem Mol Biol* 26:375–382.

1301 Tachibana T, Sakamoto T. 2014. Functions of two distinct “prolactin-releasing peptides”  
1302 evolved from a common ancestral gene. *Front Endocrinol (Lausanne)* 5:170.

1303 Tatemoto K. 1982. Neuropeptide Y: complete amino acid sequence of the brain peptide. *Proc*  
1304 *Natl Acad Sci U S A* 79:5485–5489.

1305 Tatemoto K, Carlquist M, Mutt V. 1982. Neuropeptide Y--a novel brain peptide with  
1306 structural similarities to peptide YY and pancreatic polypeptide. *Nature* 296:659–660.

1307 Tian S, Zandawala M, Beets I, Baytemur E, Slade SE, Scrivens JH, Elphick MR. 2016.  
1308 Urbilaterian origin of paralogous GnRH and corazonin neuropeptide signalling  
1309 pathways. *Sci Rep* 6:28788.

1310 Trifinopoulos J, Nguyen L-T, Haeseler A von, Minh BQ. 2016. W-IQ-TREE: a fast online  
1311 phylogenetic tool for maximum likelihood analysis. *Nucleic Acids Res* 44:W232–  
1312 W235.

1313 Vanden Broeck J. 2001. Neuropeptides and their precursors in the fruitfly, *Drosophila*  
1314 *melanogaster*. *Peptides* 22:241–254.

1315 Veenstra JA. 2011. Neuropeptide evolution: neurohormones and neuropeptides predicted  
1316 from the genomes of *Capitella teleta* and *Helobdella robusta*. *Gen Comp Endocrinol*  
1317 171:160–175.

1318 Yamanaka N, Yamamoto S, Zitnan D, Watanabe K, Kawada T, Satake H, Kaneko Y, Hiruma  
1319 K, Tanaka Y, Shinoda T, et al. 2008. Neuropeptide receptor transcriptome reveals  
1320 unidentified neuroendocrine pathways. *PLoS ONE* 3:e3048.

1321 Yañez-Guerra LA, Delroisse J, Barreiro-Iglesias A, Slade SE, Scrivens JH, Elphick MR.  
1322 2018. Discovery and functional characterisation of a luqin-type neuropeptide  
1323 signalling system in a deuterostome. *Sci Rep* 8:7220.

1324 Zandawala M, Moghul I, Yañez Guerra LA, Delroisse J, Abylkassimova N, Hugall AF,  
1325 O’Hara TD, Elphick MR. 2017. Discovery of novel representatives of bilaterian

- 1326 neuropeptide families and reconstruction of neuropeptide precursor evolution in  
1327 ophiuroid echinoderms. *Open Biol* 7.
- 1328 Zatylny-Gaudin C, Bernay B, Zanuttini B, Leprince J, Vaudry H, Henry J. 2010.  
1329 Characterization of a novel LFRFamide neuropeptide in the cephalopod *Sepia*  
1330 *officinalis*. *Peptides* 31:207–214.
- 1331 Zhang G, Fang X, Guo X, Li L, Luo R, Xu F, Yang P, Zhang L, Wang X, Qi H, et al. 2012.  
1332 The oyster genome reveals stress adaptation and complexity of shell formation.  
1333 *Nature* 490:49–54.
- 1334 Zhang L, Bijker MS, Herzog H. 2011. The neuropeptide Y system: pathophysiological and  
1335 therapeutic implications in obesity and cancer. *Pharmacol Ther* 131:91–113.
- 1336  
1337  
1338

1339 SUPPLEMENTARY FIGURES

A

```

1 taagaaaacgattctcaccggaacggaacaacatcatatacgcgaccaagacgattagct
61 tgtgtgtgtgtgtaacggttaggtgtagtgaggactaagtccaaaaggcgagcaagaca
121 gtgcaactaaagacaacaggccaacaagagtgtacagagacgttttgggttttacattc
181 ctgattatacaaaagacaacaatggatttgaagttattctcttagttggagtggtgtgt
241 gtgctccgtgcatcagcacagacagagaagtaaaagccatgcaggccgaacggacgggacag
301 cttcgccgctgaatccgctctcggcggaatttcgtcttgccgccttaaccgacgag
361 lrrrlnprfgrnfvllppltded
aacaacgccattcaagacgccgagaacggggaagaacacatgaacgagatcctgaacag
421 nnaiqdaenreehmnneilnt
atacctggcgaggtgacgaaatggaaccagcatggctgacggcacatggcgctacc
481 ctcgagaaccaactttcaaatcttcaacagaccgctggtattaaacctotaaaac
521 agactttcaccacaccacatcccttaacttttagataagaaaaacaaacaatccga
581 ccaa

```

B

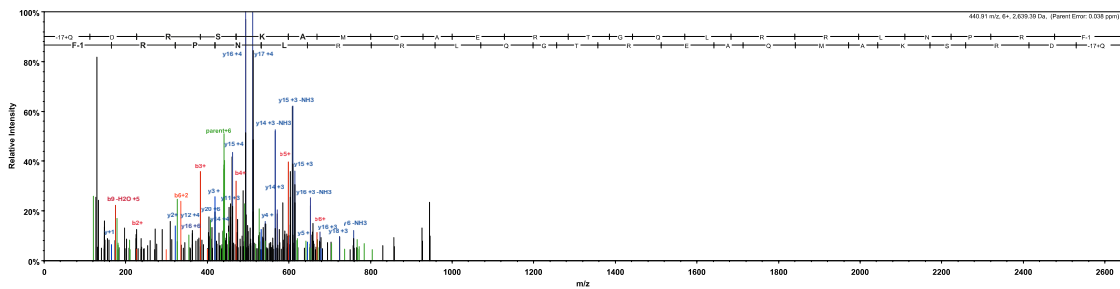

1340  
1341  
1342  
1343  
1344  
1345  
1346  
1347  
1348  
1349  
1350  
1351  
1352  
1353  
1354  
1355  
1356  
1357  
1358  
1359  
1360  
1361  
1362  
1363  
1364  
1365  
1366  
1367

**Supplementary Figure 1.** (A) Sequence of a cDNA encoding the ArNPLYP precursor. The cDNA sequence (lowercase) comprises an open reading frame of 324 bases that encode a 108-residue protein (uppercase). The predicted signal peptide is shown in blue, the predicted cleavage site is shown in green and the predicted mature peptide is shown in red but with an N-terminal glutamine is a potential substrate for pyroglutamation shown in purple and with a C-terminal glycine is a potential substrate for amidation shown in orange. The cDNA was amplified by PCR from *A. rubens* radial nerve cord cDNA using primers corresponding to the sequences highlighted in yellow. The cDNA was cloned in the vector pBluescript II SK (+) and the T3 and T7 primers were used for the sequencing. A single nucleotide that differs from a contig sequence (1060225) identified from *A. rubens* radial nerve cord transcriptome data is highlighted in black, but this is a synonymous substitution. This sequence has been deposited in GenBank under the accession number MK033631.1 (B) Annotated mass spectrum showing the structure of ArNPYL peptide isolated from an *A. rubens* radial nerve cord extract. The peptide QDRSKAMQAERTGQLRRLNPRF, with Q1-Pyroglutamate (-17.02655 Da) and F22-amidated (-0.98402 Da), was observed at charge state +6, monoisotopic m/z 440.90631 Da with a precursor mass error of 0.12 ppm [MH<sup>+</sup> 2640.40148 Da] and with a retention time (RT) of 66.3484 min. The b series of peptide fragment ions are shown in red, the y series in blue and additional identified peptide fragment ions in green. The peptide was identified with: Sequest HT (v1.17); XCorr: 4.27, Percolator q-Value: 0.0e0, Percolator PEP:1.6e-2. The fragment match tolerance used for the search was 0.8 Da. The ion table for this mass spectrum can be found in supplementary table 7.

```

1  acccttttcatagtaactcgttccctcctgcacgaagagatgagcagtgaggctatttat
61  aaaaaagagtctgtgctgaaaggagcagtcattgcttcagtgcgagtcagactgtgagat
121  ttgatatagactgtgctagatttaccctgctgtgatatctgctgcgactcgctagatgca
181  gatgttttccatcgggggtagtcggctctcttctcctggggctacatcggttgatcca
241  tcgaccagcgaccctgtatcggggatgatcaaaacttccaccaactctacacatcaaaact
301  gccataaccaatgactgatgtacacgactgttgatataatgagaagtgtgggattaaactt
361  gaccgagtgtacaaaactttctgagctagtttttttgcagcagcatgcagatgaca
                                     M Q M T      4
421  accatgtctaccatgatgaaggaaaatgaatctgatgagggtagtttctacaatgaaactg
      T M S T M M K E N E S D E G S F Y N E L      24
481  cctaccaacccttggttgaaccaggaccatgtccattgttattatattatacactggt
      P T N P L V E P G T M S I V I I L Y T V      44
541  acttgtttaatgggcatgtttggtaatggcttgattgctcctgggtcatccgaaggccc
      T C L M G M F G N G L I C L V V I R R P      64
601  aaaatgcgaccgttatcaatttattcatctgcaatcttgcactgtctgatctgggtgctt
      K M R T V I N L F I C N L A L S D L V L      84
661  tgcagctttggagctccactttagctgggtgcaatgctaagttcatcatggactctgggt
      C S F G A P L T L V A M L S S S W T L G      104
721  ctgcaccgtgtaggatttacagcatgatcacagcttgtaggtatttggtttctgcaacta
      L A P C R I Y S M I T A C M V F V S S L      124
781  acttttaactgctgttgctattgaccgattttgtctgggtgtctaccattcctctgaccc
      T F T A V A I D R F C L V V Y P F L R P      144
841  attgacaaagtcaaatgtattgttgcataatgatataatggatcatagccattgcaatg
      I D K V K C I V A I V I I W I I A I A M      164
901  acaactgcccattgcccctgaattcttatcattgactggcagaaatttataacaaaacc
      T L P I A L Q S Y I I D L A E I Y N T T      184
961  acacatacaatcgctgcattgagatttgggactacactgaaaatcgaaaaaagtacacc
      T H T I V C I E I W D Y T E N R K K Y T      204
1021  attgcaactctcgttggctcagtttgcctaccctcttttgcgtggaagtattgcacacgc
      I A L F V V Q F A Y P L L L V S I A H A      224
1081  agtattgcaatcacaactcatgcaaaacgtcaaacctggggccctgtagtgggataatgac
      S I A I K L M R N V K P G A R S R D N D      244
1141  gctatggaaaaccgctcgaaggcgaacgaatcgaatgctctccgcagtagttaccgtc
      A M E N R R R R R R T N R M L S A V V T V      264
1201  ttcgctgtgcttgggttaccatttaatgtcgtcagttccatacaagaactcgggagaaggt
      F A V S W L P F N V V S L I Q E L G E G      284
1261  gacacaccagctcacttactggtgctgctgtgactactagccgtatcgagcagctgg
      D T P S H F T G A A V Y L L A V S S T W      304
1321  ttaaactctctctacgcttggctcaatgacaatttccgcaaggagtccaccgcaatg
      L N P L L Y A W L N D N F R K E F H R M      324
1381  atgccttgcattccatgcttgaagaacccggaaacgtgggctgctcaagccctcacag
      M P C I P C L K E T R N V G C V K P S Q      344
1441  ccagggcatccacgaccaatttcatgatcgataaaacttccacagcagatgagggcaca
      P G A S T T N F M I D K R S Q P S M A T      364
1501  tatctacagccaactcctcgcgagaagagctcactcgggttaagagtggcgagbatgatacc
      Y L Q P T S V E K S S S G K S G E H D T      384
1561  actatgtgacgcaaactcatcaaaacttaccctcccaaaatcctcgcaaaactaaaacagc
      T M *
1621  ttccaatttgacgcatggacagaataaaaactgatgaaatacgaacctgttcgctataaac
1681  ttttttgatcgctatggccttcatgaattggtgagtaaacacgaaggaagttaaacaga
1741  aagaaaactattaatgtttacactaagtttaaggtttatattaattagatatttagtaagt
1801  tagtagaaagttaaagtttgaacatttaaacactgtgtggaaccttgtgtgttaaagggaa
1861  cctaaatgtaatgataattgtcatttcaagaattcgtatcgacgattatgtttgagcaaaag
1921  agactcaagataaaaactgtatacaaaatgctgcttaaaatctcctcttccacaaaacaaagt
1981  catacaaaaatgtttcatatactctcctgtagttcagcataaaaacgtagaaaaataacgc
2041  ttgaagttttttctcccaaaactttactcoggtactattattagaattactgtttct
2101  cctgtcttacaactttaaactcatgtagaaatattgtaagcctgcctttaaagttgattt
2161  cgtgaccatgggaccacttacgacaatgtgccctcatcgagtgtaacaatgggctag
2221  ggaacgatctactaaaaaaggagccatttcatctgtcaccgaactcttgataacacataaa
2281  gctaccacttttcatctacgtttgaaacagccattcagtcgaaaagtgtactacatt

```

1368  
1369  
1370  
1371  
1372  
1373  
1374  
1375  
1376  
1377  
1378

**Supplementary figure 2. *Asterias rubens* sNPF-type receptor (Ar-sNPF-R).** Sequence of a transcript (contig 1120879 from *A. rubens* radial nerve cord transcriptome) that encodes a sNPF-type receptor. The transcript sequence (lowercase; numbering on the left) and the deduced amino acid sequence (uppercase and highlighted in grey; numbering on the right) are shown. A cDNA encoding the open reading frame was cloned by PCR using primers corresponding to the sequences highlighted in yellow, ligated into the vector pCDNA 3.1 (+) and sequenced. The sequence of the cloned cDNA was identical to the open reading frame of contig 1120879, with the exception of a single nucleotide substitution (t to c; highlighted in black), which results in replacement of an isoleucine residue (codon: ata in contig 1120879) with a threonine residue (codon: aca in the cloned cDNA). This sequence has been deposited in GenBank under the accession number MH807444.1

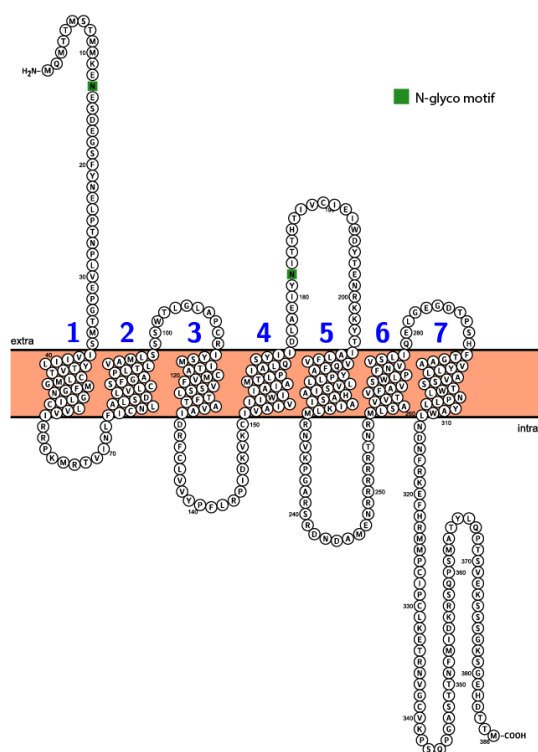

1379  
1380  
1381  
1382  
1383

**Supplementary Figure 3. Predicted topology of Ar-sNPFR.** Seven predicted transmembrane domains are numbered successively in blue and two predicted N-glycosylation sites are shown with green boxes. This figure was generated using Protter (<http://wlab.ethz.ch/protter/start/>).

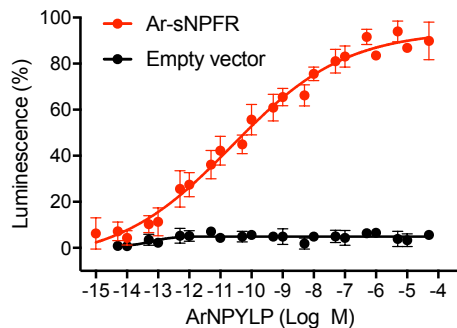

1384  
1385  
1386  
1387  
1388  
1389  
1390  
1391  
1392

**Supplementary Figure 4. The *A. rubens* NPY-like peptide ArNPYLP does not trigger luminescence in CHO-K1 cells transfected with an empty pcDNA 3.1(+) vector.** The peptide ArNPYLP triggers dose-dependent luminescence in CHO-K1 cells transfected with pcDNA 3.1 (+) vector containing the coding sequence for the *A. rubens* sNPY-type receptor Ar-sNPFR (red circles; as also shown in Figure 4) but ArNPYLP does not trigger luminescence in CHO-K1 cells transfected with an empty pcDNA 3.1(+) vector (black circles). Each point represents mean values ( $\pm$  S.E.M.) from at least three independent experiments, with each experiment performed in triplicate.

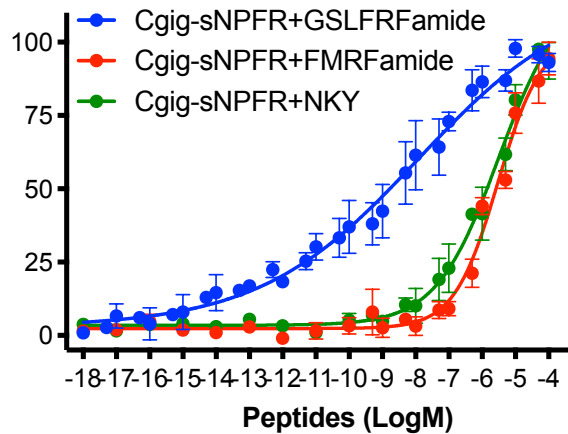

1393  
 1394 **Supplementary Figure 5. Comparison of three neuropeptides as ligands for the *Crassostrea gigas***  
 1395 **sNPf-type receptor (Cgig-sNPFR).** The *C. gigas* sNPf-type peptide GSLFRFamide, the *C. gigas* NKY-  
 1396 type peptide Cgig-NKY and the amidated tetrapeptide FMRFamide all cause dose-dependent  
 1397 luminescence in CHO-K1 cells expressing Cgig-sNPFR, the promiscuous G-protein Gα16 and the calcium  
 1398 sensitive luminescent GFP-apoaequorin fusion protein G5A. Each point represents mean values (± S.E.M)  
 1399 from at least three independent experiments done in triplicate. Cgig-NKY and FMRFamide both cause  
 1400 receptor activation but only at relatively high concentrations (EC<sub>50</sub> values are 3.02 μM and 3.4 μM,  
 1401 respectively), whereas the EC<sub>50</sub> value for the Cgig-sNPf-type peptide GSLFRFamide is 31 nM.  
 1402 Therefore, GSLFRFamide is likely to act as a ligand for Cgig-sNPFR physiologically, as proposed  
 1403 previously by Bigot et al. (2014). The ability Cgig-NKY and FMRFamide to activate Cgig-sNPFR when  
 1404 heterologously expressed in CHO-K1 cells may reflect non-physiological neuropeptide-receptor crosstalk.

1405  
 1406 **Methods for supplementary figure 5** – A cDNA encoding *C. gigas* sNPFR (Bigot et al. 2014) was  
 1407 synthesised, including a 5' partial Kozak sequence (CACC), by GenScript® (New Jersey, USA) and then cloned  
 1408 into the eukaryotic expression vector pcDNA 3.1(+) (Invitrogen; Cat. No. V790-20). CHO-K1 cells were  
 1409 cultured and transfected with Cgig-sNPFR and then peptide-induced luminescence was measured using methods  
 1410 described previously (Yañez-Guerra et al. 2018). After an incubation period of 3 h with coelenterazine H  
 1411 (Invitrogen Cat. No. C6780), cells were exposed to the synthetic peptides GSLFRFamide, FMRFamide or *C.*  
 1412 *gigas* NKY (GGIWIWMPAQGYVSVPRDEVGGASNKGSSSNLLRY-NH<sub>2</sub>), all of which were custom  
 1413 synthesised by Peptide Protein Research Ltd. (Fareham, UK). Peptides were diluted in DMEM/F12 Nutrient  
 1414 Mixture medium at concentrations ranging from 10<sup>-14</sup> M to 10<sup>-4</sup> M in clear bottom 96-well plates (Sigma-  
 1415 Aldrich; Cat. No. CLS3603-48EA). Responses were normalised and dose-reponse curves were generated as  
 1416 reported in the methodology for the pharmacological characterisation of *A. rubens* sNPf-type receptor Ar-  
 1417 sNPFR (see main methods section of the paper).

1418  
 1419 **SUPPLEMENTARY TABLES**

1420  
 1421 **Supplementary Table 1. Accession numbers of the precursor sequences used for the neuropeptide**  
 1422 **alignment in Figure 1.**

| Species name                         | Accession number or reference |
|--------------------------------------|-------------------------------|
| <i>Asterias rubens</i>               | QBB78493.1                    |
| <i>Acanthaster planci</i>            | XP_022086679.1                |
| <i>Amphiura filiformis</i>           | (Zandawala et al. 2017)       |
| <i>Strongylocentrotus purpuratus</i> | XP_001176371.1                |
| <i>Saccoglossus kowalevskii</i>      | XP_002741972.1                |
| <i>Homo sapiens</i>                  | NP_000896.1                   |
| <i>Gallus gallus</i>                 | NP_990804.1                   |
| <i>Danio rerio</i>                   | NP_571149.1                   |
| <i>Branchiostoma floridae</i>        | XP_002609542.1                |
| <i>Moniezia expansa</i>              | MH347240.1                    |
| <i>Schmidtea mediterranea</i>        | ADC84429.1                    |
| <i>Octopus bimaculoides</i>          | XP_014777727.1                |



|                                |                                      |
|--------------------------------|--------------------------------------|
| <i>Crassostrea gigas</i>       | XP_011448178.1                       |
| <i>Lymnaea stagnalis</i>       | CAB63265.1                           |
| <i>Helobdella robusta</i>      | XP_009026400.1                       |
| <i>Platynereis dumerilii</i>   | GBZT01002538.1 (predicted from mRNA) |
| <i>Priapulus caudatus</i>      | XP_014681442.1                       |
| <i>Anopheles gambiae</i>       | XP_315165.3                          |
| <i>Drosophila melanogaster</i> | XP_001953779                         |
| <i>Stomoxys calcitrans</i>     | XP_013099916.1                       |
| <i>Zootermopsis nevadensis</i> | XP_021923461.1                       |
| <i>Caenorhabditis elegans</i>  | NP_495111.1                          |

1423  
1424  
1425

**Supplementary Table 2. Accession numbers of the sequences used for the gene structure analysis in Figure 2.**

| Species name                         | mRNA           | Protein        | Genome                                        |
|--------------------------------------|----------------|----------------|-----------------------------------------------|
| <i>Acanthaster planci</i>            | XM_022230987.1 | XP_022086679.1 | NW_019091356.1                                |
| <i>Strongylocentrotus purpuratus</i> | XM_001176371.3 | XP_001176371.1 | NW_011971016.1                                |
| <i>Saccoglossus kowalevskii</i>      | XM_002741926.2 | XP_002741972.1 | NW_003156735.1                                |
| <i>Homo sapiens</i>                  | NM_000905.4    | NP_000896.1    | Whole genome accessible with NCBI SPLIGN tool |
| <i>Gallus gallus</i>                 | NM_205473.1    | NP_990804.1    | Whole genome accessible with NCBI SPLIGN tool |
| <i>Danio rerio</i>                   | NM_131074.2    | NP_571149.1    | Whole genome accessible with NCBI SPLIGN tool |
| <i>Branchiostoma floridae</i>        | XM_002609496.1 | XP_002609542.1 | NW_003101541.1                                |
| <i>Octopus bimaculoides</i>          | XM_014922241.1 | XP_014777727.1 | NW_014672493.1                                |
| <i>Crassostrea gigas</i>             | XM_011449876.2 | XP_011448178.1 | NW_011936732.1                                |
| <i>Helobdella robusta</i>            | XM_009028152.1 | XP_009026400.1 | NW_008705278.1                                |
| <i>Priapulus caudatus</i>            | XM_014825956.1 | XP_014681442.1 | NW_014577064.1                                |
| <i>Anopheles gambiae</i>             | XM_315165.4    | XP_315165.3    | NT_078266.2                                   |
| <i>Caenorhabditis elegans</i>        | NM_062710.5    | NP_495111.1    | NC_003280.10                                  |

1426  
1427  
1428

**Supplementary Table 3. Accession numbers of the receptor sequences used for the phylogenetic analysis shown in Figure 3.**

| Species                         | Accession number                  | Receptor type based on findings of this study previous used names in brackets |
|---------------------------------|-----------------------------------|-------------------------------------------------------------------------------|
| <i>Xenopus tropicalis</i>       | XP_004911210.1                    | NPYR2                                                                         |
| <i>Latimeria chalumnae</i>      | XP_014350978.1                    | NPYR2                                                                         |
| <i>Homo sapiens</i>             | NP_000901.1                       | NPYR2                                                                         |
| <i>Gallus gallus</i>            | NP_001026299.1                    | NPYR2                                                                         |
| <i>Saccoglossus kowalevskii</i> | XP_006817255.1                    | NPY/NPF-R                                                                     |
| <i>Aplysia californica</i>      | XP_005089627.1,<br>XP_005089880.1 | NPY/NPF-R                                                                     |
| <i>Lottia gigantea</i>          | XP_009066442.1                    | NPY/NPF-R                                                                     |
| <i>Lymnaea stagnalis</i>        | CAA57620.1                        | NPY/NPF-R (GPR 105)                                                           |
| <i>Capitela teleta</i>          | ELT88377.1, ELT98787.1            | NPY/NPF-R                                                                     |
| <i>Platynereis dumerilii</i>    | AKQ63068.1                        | NPY/NPF-R (GPCR 62)                                                           |

|                                      |                 |                                      |
|--------------------------------------|-----------------|--------------------------------------|
| <i>Crassostrea gigas</i>             | XP_011444490.1  | NPY/NPF-R                            |
| <i>Schmidtea mediterranea</i>        | ANO39140.1      | NPY/NPF-R (NPY5)                     |
| <i>Schmidtea mediterranea</i>        | ANO39130.1      | NPY/NPF-R (NPY1)                     |
| <i>Schmidtea mediterranea</i>        | ANO39139.1      | NPY/NPF-R (NPY3)                     |
| <i>Schmidtea mediterranea</i>        | ANO39141.1      | NPY/NPF-R (NPY6)                     |
| <i>Tribolium castaneum</i>           | XP_008198436.1  | NPY/NPF-R                            |
| <i>Drosophila melanogaster</i>       | NP_001246947.1  | NPY/NPF-R                            |
| <i>Bactrocera dorsalis</i>           | XP_011202740.1  | NPY/NPF-R                            |
| <i>Aedes aegypti</i>                 | XP_021693392.1  | NPY/NPF-R                            |
| <i>Caenorhabditis elegans</i>        | NP_508234.2     | NPY/NPF-R (NPR-11)                   |
| <i>Pristionchus pacificus</i>        | PDM84819.1      | NPY/NPF-R (NPR-11)                   |
| <i>Caenorhabditis elegans</i>        | NP_001293732.1  | NPY/NPF-R (NPR-12)                   |
| <i>Pristionchus pacificus</i>        | PDM75274.1      | NPY/NPF-R (NPR-12)                   |
| <i>Asterias rubens</i>               | MH807444        | sNPFR                                |
| <i>Acanthaster planci</i>            | XP_022101544.1  | sNPFR                                |
| <i>Strongylocentrotus purpuratus</i> | XP_003725178.1  | sNPFR                                |
| <i>Apostichopus japonicus</i>        | PIK36230.1      | sNPFR                                |
| <i>Crassostea gigas</i>              | XP_011451552.1  | sNPFR                                |
| <i>Platynereis dumerilii</i>         | AKQ63001.1      | sNPFR (NKY receptor)                 |
| <i>Capitela teleta</i>               | ELT88594.1      | sNPFR                                |
| <i>Schmidtea mediterranea</i>        | ANO39142.1      | sNPFR (NPY7)                         |
| <i>Schmidtea mediterranea</i>        | ANO39143.1      | sNPFR (NPY8)                         |
| <i>Schmidtea mediterranea</i>        | ANO39131.1      | sNPFR (NPY10)                        |
| <i>Schmidtea mediterranea</i>        | ANO39144.1      | sNPFR (NPY9)                         |
| <i>Drosophila melanogaster</i>       | NP_524176.1     | sNPFR                                |
| <i>Tribolium castaneum</i>           | XP_966794.1     | sNPFR                                |
| <i>Bombyx mori</i>                   | NP_001127707.1  | sNPFR (GPR A10)                      |
| <i>Bombyx mori</i>                   | NP_001127742.1  | sNPFR (GPR A7)                       |
| <i>Bombyx mori</i>                   | NP_001127708.1  | sNPFR (GPR A11)                      |
| <i>Aedes aegypti</i>                 | AGX84998.1      | sNPFR                                |
| <i>Priapulid caudatus</i>            | XP_014669822.1  | sNPFR                                |
| <i>Caenorhabditis elegans</i>        | NP_508816.1     | sNPFR (NPR1)                         |
| <i>Pristionchus pacificus</i>        | PDM70653.1      | sNPFR (NPR1)                         |
| <i>Caenorhabditis elegans</i>        | NP_501701.2     | sNPFR (NPR2)                         |
| <i>Caenorhabditis elegans</i>        | CAB05681.1      | sNPFR (NPR3)                         |
| <i>Caenorhabditis elegans</i>        | NP_001300304.1  | sNPFR (NPR4)                         |
| <i>Pristionchus pacificus</i>        | PDM83853.1      | sNPFR (NPR4)                         |
| <i>Caenorhabditis elegans</i>        | CCD70460.1      | sNPFR (NPR5)                         |
| <i>Pristionchus pacificus</i>        | PDM73363.1      | sNPFR (NPR5)                         |
| <i>Homo sapiens</i>                  | NP_004239.1     | Prolactin-releasing peptide receptor |
| <i>Danio rerio</i>                   | NP_001034615.1  | Prolactin-releasing peptide receptor |
| <i>Gallus gallus</i>                 | AAW30382.1      | Prolactin-releasing peptide receptor |
| <i>Alligator mississippiensis</i>    | XP_019341424.1  | Prolactin-releasing peptide receptor |
| <i>Xenopus tropicalis</i>            | XP_002940396.1  | Prolactin-releasing peptide receptor |
| <i>Branchistoma belcheri</i>         | XP_019646333.1  | Prolactin-releasing peptide receptor |
| <i>Branchistoma floridae</i>         | XP_002608333.1  | Prolactin-releasing peptide receptor |
| <i>Saccoglossus kowalevskii</i>      | XP_002740053.1, | Prolactin-releasing peptide          |

|                                      |                                                                         |            |
|--------------------------------------|-------------------------------------------------------------------------|------------|
|                                      | XP_006815575.1,<br>XP_002738225.1                                       | receptor   |
| <i>Homo sapiens</i>                  | NP_057624.3                                                             | GPCR83     |
| <i>Callorhinchus milii</i>           | XP_007900281.1                                                          | GPCR83     |
| <i>Gallus gallus</i>                 | AEO92092.1                                                              | GPCR83     |
| <i>Takifugus rubripes</i>            | XP_011617071.1                                                          | GPCR83     |
| <i>Xenopus laevis</i>                | XP_018096593.1                                                          | GPCR83     |
| <i>Apostichopus japonicus</i>        | PIK61930.1                                                              | GPCR83     |
| <i>Strongylocentrotus purpuratus</i> | XP_003729750.1                                                          | GPCR83     |
| <i>Asterias rubens</i>               | MG744509, MG744510                                                      | Luqin      |
| <i>Strongylocentrotus purpuratus</i> | XP_783326.1,<br>XP_783390.1                                             | Luqin      |
| <i>Saccoglossus kowalevskii</i>      | XM_002731957.1,<br>XM_002731958.1,<br>XM_006813011.1,<br>XM_002731956.1 | Luqin      |
| <i>Aplysia californica</i>           | XP_012937781.1                                                          | Luqin      |
| <i>Lottia gigantea</i>               | XP_009064514.1,<br>XP_009064591.1                                       | Luqin      |
| <i>Lymnea stagnalis</i>              | AAB92258.1                                                              | Luqin      |
| <i>Octopus bimaculoides</i>          | XP_014786450.1                                                          | Luqin      |
| <i>Capitella teleta</i>              | ELT96089.1                                                              | Luqin      |
| <i>Platynereis dumerilii</i>         | KP420214.1                                                              | Luqin      |
| <i>Priapulius caudatus</i>           | XP_014666446.1,<br>XP_014678140.1                                       | Luqin      |
| <i>Acyrtosiphon pisum</i>            | XP_008178727.1,<br>XP_003241610.1                                       | RYamide    |
| <i>Tribolium castaneum</i>           | HQ709383.1                                                              | RYamide    |
| <i>Aedes aegypti</i>                 | AGX85003.1                                                              | RYamide    |
| <i>Drosophila melanogaster</i>       | P25931.2                                                                | RYamide    |
| <i>Caenorhabditis elegans</i>        | NP_001023541.1                                                          | Luqin      |
| <i>Trichuris suis</i>                | KFD65303.1                                                              | Luqin      |
| <i>Homo sapiens</i>                  | AAB20303.1,<br>NP_001049.1,<br>NP_001050.1                              | Tachykinin |
| <i>Ciona intestinalis</i>            | XM_009863501.2                                                          | Tachykinin |
| <i>Asterias rubens</i>               | MG744511, MG744512                                                      | Tachykinin |
| <i>Strongylocentrotus purpuratus</i> | XP_011662258.1                                                          | Tachykinin |
| <i>Octopus vulgaris</i>              | BAD93354.1                                                              | Tachykinin |
| <i>Aplysia californica</i>           | XP_012936180.1                                                          | Tachykinin |
| <i>Lottia gigantea</i>               | XP_009062052.1                                                          | Tachykinin |
| <i>Capitella teleta</i>              | ELT98449.1                                                              | Tachykinin |
| <i>Urechis unitinctus</i>            | BAB87199.1                                                              | Tachykinin |
| <i>Drosophila melanogaster</i>       | FBtr0085507                                                             | Tachykinin |
| <i>Tribolium castaneum</i>           | XP_008194527.2                                                          | Tachykinin |

1429  
1430  
1431  
1432

**Supplementary Table 4. Accession numbers of the precursor sequences used for the alignment in figure 5.**

| Species name                         | Accession number        |
|--------------------------------------|-------------------------|
| <i>Asterias rubens</i>               | QBB78493.1              |
| <i>Acanthaster planci</i>            | XP_022086679.1          |
| <i>Amphiura filiformis</i>           | (Zandawala et al. 2017) |
| <i>Strongylocentrotus purpuratus</i> | XP_001176371.1          |

|                                     |                |
|-------------------------------------|----------------|
| <i>Crassostrea gigas</i>            | EKC33711.1     |
| <i>Lymnaea stagnalis</i>            | AAV41057.1     |
| <i>Platynereis dumerilii</i>        | AEE25645.1     |
| <i>Schmidtea mediterranea</i>       | DAA33926.1     |
| <i>Drosophila melanogaster</i>      | NP_724239.1    |
| <i>Bombyx mori</i>                  | NP_001127729.1 |
| <i>Tribolium castaneum</i>          | DAA34847.1     |
| <i>Caenorhabditis elegans</i> flp3  | NP_509694.1    |
| <i>Caenorhabditis elegans</i> flp15 | NP_499820.1    |
| <i>Caenorhabditis elegans</i> flp18 | NP_508514.2    |
| <i>Caenorhabditis elegans</i> flp21 | NP_505011.2    |

1433

1434

1435

**Supplementary Table 5. Accession numbers of sequences used for the gene structure comparison in figure 6.**

| Species name                         | mRNA           | Protein        | Genome                                        |
|--------------------------------------|----------------|----------------|-----------------------------------------------|
| <i>Acanthaster planci</i>            | XM_022230987.1 | XP_022086679.1 | NW_019091356.1                                |
| <i>Strongylocentrotus purpuratus</i> | XM_001176371.3 | XP_001176371.1 | Whole genome accessible with NCBI SPLIGN tool |
| <i>Crassostrea gigas</i>             | FQ665026.1     | EKC33711.1     | JH819141.1                                    |
| <i>Pomacea canaliculata</i>          | XM_025228896.1 | XP_025084681.1 | NC_037591.1                                   |
| <i>Tribolium castaneum</i>           | XM_008200483.2 | XP_008198705.1 | Whole genome accessible with NCBI SPLIGN tool |
| <i>Apis mellifera</i>                | XM_003250107.4 | XP_003250155.1 | Whole genome accessible with NCBI SPLIGN tool |
| <i>Drosophila melanogaster</i>       | NM_165316.2    | NP_724239.1    | Whole genome accessible with NCBI SPLIGN tool |
| <i>Caenorhabditis elegans</i> flp-3  | NM_077293.6    | NP_509694.1    | NC_003284.9                                   |
| <i>Caenorhabditis elegans</i> flp-15 | NM_067419.3    | NP_499820.1    | NC_003281.10                                  |
| <i>Caenorhabditis elegans</i> flp-18 | NM_076113.5    | NP_508514.2    | NC_003284.9                                   |
| <i>Caenorhabditis elegans</i> flp-21 | NM_072610.6    | NP_505011.2    | NC_003283.11                                  |

1436

1437

1438

**Supplementary Table 6. Accession numbers of sequences used for the alignment and gene structure comparison in figure 7.**

| Species name                         | mRNA           | Protein                 | Genome                                        |
|--------------------------------------|----------------|-------------------------|-----------------------------------------------|
| <i>Asterias rubens</i>               |                | QBB78493.1              |                                               |
| <i>Acanthaster planci</i>            | XM_022230987.1 | XP_022086679.1          | NW_019091356.1                                |
| <i>Amphiura filiformis</i>           |                | (Zandawala et al. 2017) |                                               |
| <i>Strongylocentrotus purpuratus</i> | XM_001176371.3 | XP_001176371.1          | Whole genome accessible with NCBI SPLIGN tool |
| <i>Homo sapiens</i>                  | BC069284.1     | AAH69284.1              | Whole genome accessible with NCBI SPLIGN tool |

|                                   |                |                        |                                               |
|-----------------------------------|----------------|------------------------|-----------------------------------------------|
| <i>Xenopus laevis</i>             |                | OCT75971.1             |                                               |
| <i>Gallus gallus</i>              | NM_001082419.1 | NP_001075888.1         | Whole genome accessible with NCBI SPLIGN tool |
| <i>Python bivittatus</i>          | XM_025171672.1 | XP_025027440.1         | NW_006532108.1                                |
| <i>Danio rerio</i>                | NM_001245985.1 | NP_001232914.1         | Whole genome accessible with NCBI SPLIGN tool |
| <i>Latimeria chalumnae</i>        |                | XP_006008888.1         |                                               |
| <i>Lepisosteus oculatus</i>       |                | ALD51284.1             |                                               |
| <i>Paramormyrops kingsleyae</i>   |                | XP_023653061.1         |                                               |
| <i>Petromyzon marinus</i>         |                | ALD51287.1             |                                               |
| <i>Branchiostoma floridae</i>     | XM_002595829.1 | XP_002595875.1         | ABEP02025055.1                                |
| <i>Saccoglossus kowalevskii</i>   | XM_002737009.1 | XP_002737055.1         | NW_003134358.1                                |
| <i>Saccoglossus kowalevskii 2</i> |                | Personal communication | NW_003156735.1                                |

1439

1440

1441  
1442  
1443

**Supplementary Table 7. Fragmentation table of the mass spectra for the Ar-sNPF peptide (QDRSKAMQAERTGQLRRLNPRF), F22-Amidated (-0.98402 Da), Q1-Pyroglutamate (-17.02655 Da), observed at charge state +6, monoisotopic m/z 440.90631 Da with a precursor mass error of 0.12 ppm).**

| #1 | b <sup>+</sup> | b <sup>2+</sup> | b <sup>3+</sup> | b <sup>4+</sup> | b <sup>5+</sup> | b <sup>6+</sup> | Seq.                | y <sup>+</sup> | y <sup>2+</sup> | y <sup>3+</sup> | y <sup>4+</sup> | y <sup>5+</sup> | y <sup>6+</sup> | #2 |
|----|----------------|-----------------|-----------------|-----------------|-----------------|-----------------|---------------------|----------------|-----------------|-----------------|-----------------|-----------------|-----------------|----|
| 1  | 112.03931      | 56.52329        | 38.01795        | 28.76528        | 23.21368        | 19.51261        | Q-Gln-<br>>pyro-Glu |                |                 |                 |                 |                 |                 | 22 |
| 2  | 227.06625      | 114.03676       | 76.36027        | 57.52202        | 46.21907        | 38.68377        | D                   | 2529.36915     | 1265.18821      | 843.79457       | 633.09774       | 506.67965       | 422.40092       | 21 |
| 3  | 383.16736      | 192.08732       | 128.39397       | 96.54730        | 77.43929        | 64.70062        | R                   | 2414.34221     | 1207.67474      | 805.45225       | 604.34101       | 483.67426       | 403.22976       | 20 |
| 4  | 470.19939      | 235.60333       | 157.40465       | 118.30530       | 94.84570        | 79.20596        | S                   | 2258.24110     | 1129.62419      | 753.41855       | 565.31573       | 452.45404       | 377.21291       | 19 |
| 5  | 598.29435      | 299.65081       | 200.10297       | 150.32905       | 120.46469       | 100.55512       | K                   | 2171.20907     | 1086.10817      | 724.40787       | 543.55772       | 435.04763       | 362.70758       | 18 |
| 6  | 669.33146      | 335.16937       | 223.78201       | 168.08832       | 134.67211       | 112.39464       | A                   | 2043.11410     | 1022.06069      | 681.70955       | 511.53398       | 409.42864       | 341.35841       | 17 |
| 7  | 800.37195      | 400.68961       | 267.46217       | 200.84844       | 160.88021       | 134.23472       | M                   | 1972.07699     | 986.54213       | 658.03051       | 493.77471       | 395.22122       | 329.51890       | 16 |
| 8  | 928.43053      | 464.71890       | 310.14836       | 232.86309       | 186.49193       | 155.57782       | Q                   | 1841.03651     | 921.02189       | 614.35035       | 461.01458       | 369.01312       | 307.67881       | 15 |
| 9  | 999.46764      | 500.23746       | 333.82740       | 250.62237       | 200.69935       | 167.41734       | A                   | 1712.97793     | 856.99260       | 571.66416       | 428.99994       | 343.40141       | 286.33572       | 14 |
| 10 | 1128.51023     | 564.75875       | 376.84160       | 282.88302       | 226.50787       | 188.92444       | E                   | 1641.94081     | 821.47405       | 547.98512       | 411.24066       | 329.19398       | 274.49620       | 13 |
| 11 | 1284.61134     | 642.80931       | 428.87530       | 321.90829       | 257.72809       | 214.94129       | R                   | 1512.89822     | 756.95275       | 504.97092       | 378.98001       | 303.38547       | 252.98910       | 12 |
| 12 | 1385.65902     | 693.33315       | 462.55786       | 347.17021       | 277.93763       | 231.78257       | T                   | 1356.79711     | 678.90219       | 452.93722       | 339.95474       | 272.16524       | 226.97225       | 11 |
| 13 | 1442.68049     | 721.84388       | 481.56501       | 361.42558       | 289.34192       | 241.28614       | G                   | 1255.74943     | 628.37835       | 419.25466       | 314.69282       | 251.95571       | 210.13097       | 10 |
| 14 | 1570.73906     | 785.87317       | 524.25121       | 393.44022       | 314.95363       | 262.62924       | Q                   | 1198.72797     | 599.86762       | 400.24751       | 300.43745       | 240.55142       | 200.62739       | 9  |
| 15 | 1683.82313     | 842.41520       | 561.94589       | 421.71124       | 337.57045       | 281.47659       | L                   | 1070.66939     | 535.83833       | 357.56131       | 268.42281       | 214.93970       | 179.28430       | 8  |
| 16 | 1839.92424     | 920.46576       | 613.97960       | 460.73652       | 368.79067       | 307.49344       | R                   | 957.58533      | 479.29630       | 319.86663       | 240.15179       | 192.32289       | 160.43695       | 7  |
| 17 | 1996.02535     | 998.51631       | 666.01330       | 499.76179       | 400.01089       | 333.51029       | R                   | 801.48422      | 401.24575       | 267.83292       | 201.12651       | 161.10266       | 134.42010       | 6  |
| 18 | 2109.10941     | 1055.05834      | 703.70799       | 528.03281       | 422.62770       | 352.35763       | L                   | 645.38311      | 323.19519       | 215.79922       | 162.10123       | 129.88244       | 108.40325       | 5  |
| 19 | 2223.15234     | 1112.07981      | 741.72230       | 556.54354       | 445.43629       | 371.36479       | N                   | 532.29904      | 266.65316       | 178.10453       | 133.83022       | 107.26563       | 89.55590        | 4  |
| 20 | 2320.20510     | 1160.60619      | 774.07322       | 580.80673       | 464.84684       | 387.54025       | P                   | 418.25611      | 209.63170       | 140.09022       | 105.31949       | 84.45704        | 70.54875        | 3  |
| 21 | 2476.30622     | 1238.65675      | 826.10692       | 619.83201       | 496.06706       | 413.55710       | R                   | 321.20335      | 161.10531       | 107.73930       | 81.05630        | 65.04649        | 54.37329        | 2  |
| 22 |                |                 |                 |                 |                 |                 | F-amidated          | 165.10224      | 83.05476        | 55.70560        | 42.03102        | 33.82627        | 28.35644        | 1  |

1444
